# Supplementary material for: Machine Learning Reveals Biocontrol Agents Shaping Disease Protection in Natural Arabidopsis Populations and Synthetic Communities
Source: Research Square preprint supplement (doi:10.21203/rs.3.rs-6130404/v1), 2025-03-14
Supplement: Supplementary file 1 [file 0228d4dca2c5ca39bf8a9719.xlsx]

## Sheet: Collected samples
Total number of infected and uninfected samples
Sampling years	# uninfected	# infected
Year_2014	13	12
Year_2015	33	27
Year_2016	54	15
Year_2017	56	14
Year_2018	46	21
Year_2019	52	8
Distribution of collected samples across sampling sites
Sampling sites	# uninfected	# infected
ERG	21	42
EY	29	43
JUG	14	52
K69	0	38
PFN	0	40
WH	33	39
samples across genotype cluster and sampling site
Genotypes	ERG	EY	JUG	K69	PFN	WH
genotypeC1	0	6	1	5	1	7
genotypeC2	1	6	4	7	1	8
genotypeC3	2	0	7	0	4	0
genotypeC4	5	13	4	0	2	6
genotypeC5	6	0	0	0	0	0
