# Supplementary material for: Machine Learning Reveals Biocontrol Agents Shaping Disease Protection in Natural Arabidopsis Populations and Synthetic Communities
Source: Research Square preprint supplement (doi:10.21203/rs.3.rs-6130404/v1), 2025-03-14
Supplement: Supplementary file 2 [file 1928b2ba1591233d76045ce0.xlsx]

## Sheet: Bacteria_blast
OTUGenus	Taxa	OTU	Blast_16S_DB	Quary cover	Percentage identity	BlastSecondhit	Quary cover2	Percentage identity3	LabelToUse
Sphingomonas_BV5_Otu000002	BV5	Otu000002	Sphingomonas faeni	100	99.74		100	98.93	Sphingomonas
Methylobacterium-Methylorubrum_BV5_Otu000003	BV5	Otu000003	Methylobacterium gossipiicola	100	99.21	Methylobacterium goesingense			Methylobacterium
Duganella_BV5_Otu000004	BV5	Otu000004	Duganella phyllosphaerae	100	100	Duganella zoogloeoides			Duganella
Pseudomonas_BV5_Otu000005	BV5	Otu000005	Pseudomonas fildesensis	100	100				Pseudomonas
Pseudomonas_BV5_Otu000006	BV5	Otu000006	Pseudomonas viridiflava	100	99.74				Pseudomonas
Flavobacterium_BV5_Otu000009	BV5	Otu000009	Flavobacterium panaciterrae	100	99.73				Flavobacterium
Brevundimonas_BV5_Otu000010	BV5	Otu000010	Brevundimonas mongoliensis	100	99.47				Brevundimonas
Rathayibacter_BV5_Otu000011	BV5	Otu000011	Rathayibacter caricis	100	100				Rathayibacter
Buchnera_BV5_Otu000012	BV5	Otu000012	Buchnera aphidicola	100	98.68				Buchnera
Oxalobacteraceae_unclassified_BV5_Otu000013	BV5	Otu000013	Pseudoduganella plicata	100	100				Pseudoduganella
Allorhizobium-Neorhizobium-Pararhizobium-Rhizobium_BV5_Otu000014	BV5	Otu000014	Agrobacterium rubi	100	99.48	Rhizobium skierniewicense	100	99.48	Rhizobium
Sphingomonas_BV5_Otu000015	BV5	Otu000015	Sphingomonas cynarae	100	99.21	Sphingomonas melonis	100	98.95	Sphingomonas
Methylobacterium-Methylorubrum_BV5_Otu000016	BV5	Otu000016	Methylobacterium marchantiae	100	99.74				Methylobacterium
Oxalobacteraceae_unclassified_BV5_Otu000017	BV5	Otu000017	Janthinobacterium svalbardensis	100	99.47				Janthinobacterium
Comamonadaceae_unclassified_BV5_Otu000018	BV5	Otu000018	Acidovorax facilis	100	99.21				Acidovorax
Allorhizobium-Neorhizobium-Pararhizobium-Rhizobium_BV5_Otu000024	BV5	Otu000024	Ferranicluibacter rubi	100	99.21	Rhizobium soli DS-42	100	98.94	Ferranicluibacter
Bosea_BV5_Otu000027	BV5	Otu000027	Bosea vestrisii	100	100				Bosea
Aureimonas_BV5_Otu000033	BV5	Otu000033	Antarcticirhabdus aurantiaca	100	98.15	Aureimonas altamirensis	100	98.15	Aureimonas
Bacillus_BV5_Otu000039	BV5	Otu000039	Bacillus renqingensis	100	100				Bacillus
Xanthomonadaceae_unclassified_BV5_Otu000058	BV5	Otu000058	Lysobacter capsici	100	100				Lysobacter
Pelomonas_BV5_Otu000059	BV5	Otu000059	Inhella proteolytica	100	98.93				Inhella
Comamonadaceae_unclassified_BV5_Otu000060	BV5	Otu000060	Xenophilus aerolatus	100	98.94				Xenophilus
Pseudomonas_BV5_Otu000110	BV5	Otu000110	Pseudomonas lalkuanensis	100	99.74				Pseudomonas
Streptococcus_BV5_Otu000112	BV5	Otu000112	Streptococcus timonensis	100	100				Streptococcus
Streptococcus_BV5_Otu000141	BV5	Otu000141	Streptococcus thermophilus	100	100				Streptococcus
Xanthomonas_BV5_Otu000186	BV5	Otu000186	Xanthomonas prunicola	100	99.74				Xanthomonas
Alcaligenaceae_unclassified_BV5_Otu000195	BV5	Otu000195	Pigmentiphaga litoralis	100	99.47				Pigmentiphaga
Caulobacteraceae_unclassified_BV5_Otu000218	BV5	Otu000218	Caulobacter henricii	100	98.42				Caulobacter
Cupriavidus_BV5_Otu000312	BV5	Otu000312	Cupriavidus metallidurans	100	100				Cupriavidus
Microbacteriaceae_unclassified_BV5_Otu000334	BV5	Otu000334	Frigoribacterium faeni	100	99.74				Frigoribacterium
Caulobacteraceae_unclassified_BV5_Otu000470	BV5	Otu000470	Caulobacter profundus	100	95.23				Caulobacter
Fimbriimonadaceae_ge_BV5_Otu000693	BV5	Otu000693	Fimbriimonas ginsengisoli	100	94.27				Fimbriimonas
Lawsonella_BV5_Otu000881	BV5	Otu000881	Lawsonella clevelandensis	100	98.95				Lawsonella

## Sheet: Bacteria_fasta
>Otu000002
TGGTAGTCCACGCCGTAAACGATGATAACTAGCTGTCCGGACACTTGGTGTTTGGGTGGCGCAGCTAACGCATTAAGTTATCCGCCTGGGGAGTACGGCCGCAAGGTTAAAACTCAAATGAATTGACGGGGGCCTGCACAAGCGGTGGAGCATGTGGTTTAATTCGAAGCAACGCGCAGAACCTTACCAGCGTTTGACATGGCAGGACGACTTCCAGAGATGGATTTCTTCCCTTCGGGGACCTGCACACAGGTGCTGCATGGCTGTCGTCAGCTCGTGTCGTGAGATGTTGGGTTAAGTCCCGCAACGAGCGCAACCCTCGCCTTTAGTTGCCATCATTTAGTTGGGCACTTTAAAGGAACCGCCGGTGATAAGCCGGA--
>Otu000003
TGGTAGTCCACGCCGTAAACGATGAATGCTAGCTGTTGGGGTGCTTGCACCGCAGTAGCGCAGCTAACGCTTTAAGCATTCCGCCTGGGGAGTACGGTCGCAAGATTAAAACTCAAAGGAATTGACGGGGGCCCGCACAAGCGGTGGAGCATGTGGTTTAATTCGAAGCAACGCGCAGAACCTTACCATCCCTTGACATGTCGTGCCAGCTGGAGAGATCCAGGGTTCCCTTCGGGGACGCGAACACAGGTGCTGCATGGCTGTCGTCAGCTCGTGTCGTGAGATGTTGGGTTAAGTCCCGCAACGAGCGCAACCCACGTCCTTAGTTGCCATCATTCAGTTGGGCACTCTAGGGAGACTGCCGGTGATAAGCCGCGA--
>Otu000004
TGGTAGTCCACGCCCTAAACGATGTCTACTAGTTGTCGGGTTTTAATTAACTTGGTAACGCAGCTAACGCGTGAAGTAGACCGCCTGGGGAGTACGGTCGCAAGATTAAAACTCAAAGGAATTGACGGGGACCCGCACAAGCGGTGGATGATGTGGATTAATTCGATGCAACGCGAAAAACCTTACCTACCCTTGACATGGCAGAAATCCCGGAGAGATTCGGGAGTGCTCGAAAGAGAATCTGCACACAGGTGCTGCATGGCTGTCGTCAGCTCGTGTCGTGAGATGTTGGGTTAAGTCCCGCAACGAGCGCAACCCTTGTCATTAGTTGCTACGAAAGAGCACTCTAATGAGACTGCCGGTGACAAACCGGA--
>Otu000005
TGGTAGTCCACGCCGTAAACGATGTCAACTAGCCGTTGGGAGCCTTGAGCTCTTAGTGGCGCAGCTAACGCATTAAGTTGACCGCCTGGGGAGTACGGCCGCAAGGTTAAAACTCAAATGAATTGACGGGGGCCCGCACAAGCGGTGGAGCATGTGGTTTAATTCGAAGCAACGCGAAGAACCTTACCAGGCCTTGACATCCAATGAACTTTCTAGAGATAGATTGGTGCCTTCGGGAACATTGAGACAGGTGCTGCATGGCTGTCGTCAGCTCGTGTCGTGAGATGTTGGGTTAAGTCCCGTAACGAGCGCAACCCTTGTCCTTAGTTACCAGCACGTAATGGTGGGCACTCTAAGGAGACTGCCGGTGACAAACCGGA--
>Otu000006
TGGTAGTCCACGCCGTAAACGATGTCAACTAGCCGTTGGAATCCTTGAGATTTTAGTGGCGCAGCTAACGCATTAAGTTGACCGCCTGGGGAGTACGGCCGCAAGGTTAAAACTCAAATGAATTGACGGGGGCCCGCACAAGCGGTGGAGCATGTGGTTTAATTCGAAGCAACGCGAAGAACCTTACCAGGCCTTGACATCCAATGAATCCTTTAGAGATAGAGGAGTGCCTTCGGGAGCATTGAGACAGGTGCTGCATGGCTGTCGTCAGCTCGTGTCGTGAGATGTTGGGTTAAGTCCCGTAACGAGCGCAACCCTTGTCCTTAGTTACCAGCACGTCATGGTGGGCACTCTAAGGAGACTGCCGGTGACAAACCGGA--
>Otu000009
TGGTAGTCCACGCCGTAAACGATGGATACTAGCTGTTGGGTGCAAACTCAGTGGCTAAGCGAAAGTGATAAGTATCCCACCTGGGGAGTACGTTCGCAAGAATGAAACTCAAAGGAATTGACGGGGGCCCGCACAAGCGGTGGAGCATGTGGTTTAATTCGATGATACGCGAGGAACCTTACCAAGGCTTAAATGTAGATTGACCGGTTTGGAAACAGATCTTTCGCAAGACAATTTACAAGGTGCTGCATGGTTGTCGTCAGCTCGTGCCGTGAGGTGTCAGGTTAAGTCCTATAACGAGCGCAACCCCTGTTGTTAGTTGCCAGCGAGTCATGTCGGGAACTCTAACAAGACTGCCAGTGCAAACTGTGA--
>Otu000010
TGGTAGTCCACGCCGTAAACGATGATTGCTAGTTGTCGGGATGTTTACATCTCGGTGACGCAGCTAACGCATTAAGCAATCCGCCTGGGGAGTACGGTCGCAAGATTAAAACTCAAAGGAATTGACGGGGGCCCGCACAAGCGGTGGAGCATGTGGTTTAATTCGAAGCAACGCGCAGAACCTTACCACCTTTTGACATGCCTGGACCGCCAGAGAGATCTGGCTTTCTCTTCGGAGACTAGGACACAGGTGCTGCATGGCTGTCGTCAGCTCGTGTCGTGAGATGTTGGGTTAAGTCCCGCAACGAGCGCAACCCTCGCCATTAGTTGCCATCATTTAGTTGGGAACTCTAATGGGACTGCCGGTGCTAAGCCGGA--
>Otu000011
TGGTAGTCCACGCCGTAAACGTTGGGAACTAGATGTGGGGACCTTTCCACGGTCTCCGTGTCGCAGCTAACGCATTAAGTTCCCCGCCTGGGGAGTACGGCCGCAAGGCTAAAACTCAAAGGAATTGACGGGGGCCCGCACAAGCGGCGGAGCATGCGGATTAATTCGATGCAACGCGAAGAACCTTACCAAGGCTTGACATATACCGGAAACTTCCAGAAATGGTTGCCCCGCAAGGTCGGTATACAGGTGGTGCATGGTTGTCGTCAGCTCGTGTCGTGAGATGTTGGGTTAAGTCCCGCAACGAGCGCAACCCTCGTTCTATGTTGCCAGCACGTCATGGTGGGAACTCATAGGAGACTGCCGGGGTCAACTCGGA
>Otu000012
TGGTAGTCCATGCCGTAAACGATGTCGACTTGGAGGTTGTTTCCAAGAGAAGTGACTTCCGAAGCTAACGCATTAAGTCGACCGCCTGGGGAGTACGGCCGCAAGGCTAAAACTCAAATGAATTGACGGGGGCCCGCACAAGCGGTGGAGCATGTGGTTTAATTCGATGCAACGCGAAAAACCTTACCTGGTCTTGACATCCATAGAATTCTTTAGAAATAAAGAAGTGCCTTCGGGAACTATGAGACAGGTGCTGCATGGCTGTCGTCAGCTCGTGTTGTGAAATGTTGGGTTAAGTCCCGCAACGAGCGCAACCCTTATCCCCTGTTGCCAGCGGTTCGGCCGGGAACTCAGAGGAGACTGCCGGTTATAAACCGGA--
>Otu000013
TGGTAGTCCACGCCCTAAACGATGTCTACTAGTTGTCGGGTCTTAATTGACTTGGTAACGCAGCTAACGCGTGAAGTAGACCGCCTGGGGAGTACGGTCGCAAGATTAAAACTCAAAGGAATTGACGGGGACCCGCACAAGCGGTGGATGATGTGGATTAATTCGATGCAACGCGAAAAACCTTACCTACCCTTGACATGTACGGAAGCCACGAGAGATCGAGGTGTGCTCGAAAGAGAACCGTAACACAGGTGCTGCATGGCTGTCGTCAGCTCGTGTCGTGAGATGTTGGGTTAAGTCCCGCAACGAGCGCAACCCTTGTCATTAGTTGCTACGAAAGAGCACTCTAATGAGACTGCCGGTGACAAACCGGA--
>Otu000014
TGGTAGTCCACGCCGTAAACGATGAATGTTAGCCGTCGGGCAGTTGACTGTTCGGTGGCGCAGCTAACGCATTAAACATTCCGCCTGGGGAGTACGGTCGCAAGATTAAAACTCAAAGGAATTGACGGGGGCCCGCACAAGCGGTGGAGCATGTGGTTTAATTCGAAGCAACGCGCAGAACCTTACCAGCTCTTGACATTCGGGGTTTGGGCAGTGGAGACATTGTCCTTCAGTTAGGCTGGCCCCAGAACAGGTGCTGCATGGCTGTCGTCAGCTCGTGTCGTGAGATGTTGGGTTAAGTCCCGCAACGAGCGCAACCCTCGCCCTTAGTTGCCAGCATTGAGTTGGGCACTCTAAGGGGACTGCCGGTGATAAGCCGAGA--
>Otu000015
TGGTAGTCCACGCCGTAAACGATGATAACTAGCTGTCCGGGGACTTAGTCTTTGGGTGGCGCAGCTAACGCATTAAGTTATCCGCCTGGGGAGTACGGCCGCAAGGTTAAAACTCAAATGAATTGACGGGGGCCTGCACAAGCGGTGGAGCATGTGGTTTAATTCGAAGCAACGCGCAGAACCTTACCAGCGTTTGACATGTCCGGACGATTTCCAGAGATGGATCTCTTCCCTTCGGGGACTGGAACACAGGTGCTGCATGGCTGTCGTCAGCTCGTGTCGTGAGATGTTGGGTTAAGTCCCGCAACGAGCGCAACCCTCGACTTTAGTTACCATCATTCAGTTGGGTACTCTAAAGTAACCGCCGGTGATAAGCCGGA--
>Otu000016
TGGTAGTCCACGCCGTAAACGATGAATGCCAGCTGTTGGGGTGCTTGCACCTCAGTAGCGCAGCTAACGCTTTAAGCATTCCGCCTGGGGAGTACGGTCGCAAGATTAAAACTCAAAGGAATTGACGGGGGCCCGCACAAGCGGTGGAGCATGTGGTTTAATTCGAAGCAACGCGCAGAACCTTACCATCCCTTGACATGGCATGTTACCCGGAGAGATTCGGGGTCCACTTCGGTGGCGTGCACACAGGTGCTGCATGGCTGTCGTCAGCTCGTGTCGTGAGATGTTGGGTTAAGTCCCGCAACGAGCGCAACCCACGTCCTTAGTTGCCATCATTTAGTTGGGCACTCTAGGGAGACTGCCGGTGATAAGCCGCGA--
>Otu000017
TGGTAGTCCACGCCCTAAACGATGTCTACTAGTTGTCGGGTCTTAATTGACTTGGTAACGCAGCTAACGCGTGAAGTAGACCGCCTGGGGAGTACGGTCGCAAGATTAAAACTCAAAGGAATTGACGGGGACCCGCACAAGCGGTGGATGATGTGGATTAATTCGATGCAACGCGAAAAACCTTACCTACCCTTGACATGGCTGGAATCCTTGAGAGATCAGGGAGTGCCCGAAAGGGAACCAGTACACAGGTGCTGCATGGCTGTCGTCAGCTCGTGTCGTGAGATGTTGGGTTAAGTCCCGCAACGAGCGCAACCCTTGTCATTAGTTGCTACGAAAGGGCACTCTAATGAGACTGCCGGTGACAAACCGGA
>Otu000018
TGGTAGTCCACGCCCTAAACGATGTCAACTGGTTGTTGGGTCTTCACTGACTCAGTAACGAAGCTAACGCGTGAAGTTGACCGCCTGGGGAGTACGGCCGCAAGGTTGAAACTCAAAGGAATTGACGGGGACCCGCACAAGCGGTGGATGATGTGGTTTAATTCGATGCAACGCGAAAAACCTTACCCACCTTTGACATGTACGGAATCCTCCAGAGATGGAGGAGTGCTCGAAAGAGAACCGTAACACAGGTGCTGCATGGCTGTCGTCAGCTCGTGTCGTGAGATGTTGGGTTAAGTCCCGCAACGAGCGCAACCCTTGTCATTAGTTGCTACATTTAGTTGGGCACTCTAATGAGACTGCCGGTGACAAACCGGA--
>Otu000024
TGGTAGTCCACGCCGTAAACGATGAATGTTAGCCGTCGGGCAGTTTACTGTTCGGTGGCGCAGCTAACGCATTAAACATTCCGCCTGGGGAGTACGGTCGCAAGATTAAAACTCAAAGGAATTGACGGGGGCCCGCACAAGCGGTGGAGCATGTGGTTTAATTCGAAGCAACGCGCAGAACCTTACCAGCCCTTGACATGTCCGGCTAGCCGCAGAGATGCGGTGTTCCCTTCGGGGACCGGAGCACAGGTGCTGCATGGCTGTCGTCAGCTCGTGTCGTGAGATGTTGGGTTAAGTCCCGCAACGAGCGCAACCCTCGCCCTTAGTTGCCAGCATTCAGTTGGGCACTCTAAGGGGACTGCCGGTGATAAGCCGAGA--
>Otu000027
TGGTAGTCCACGCCGTAAACGATGAATGCCAGCCGTTGGGGTGCATGCACTTCAGTGGCGCAGCTAACGCTTTAAGCATTCCGCCTGGGGAGTACGGTCGCAAGATTAAAACTCAAAGGAATTGACGGGGGCCCGCACAAGCGGTGGAGCATGTGGTTTAATTCGAAGCAACGCGCAGAACCTTACCAGCTTTTGACATGTCCGGTTTGATCGACAGAGATGTCTTTCTTCAGTTCGGCTGGCCGGAACACAGGTGCTGCATGGCTGTCGTCAGCTCGTGTCGTGAGATGTTGGGTTAAGTCCCGCAACGAGCGCAACCCTCGCCCCTAGTTGCCATCATTCAGTTGGGAACTCTAGGGGGACTGCCGGTGATAAGCCGCGA--
>Otu000033
TGGTAGTCCACGCCGTAAACGATGGAAGCTAGCCGTCGGGTGATTTATCACTCGGTGGCGCAGCCAACGCATTAAGCTTCCCGCCTGGGGAGTACGGTCGCAAGATTAAAACTCAAAGGAATTGACGGGGGCCCGCACAAGCGGTGGAGCATGTGGTTTAATTCGAAGCAACGCGCAGAACCTTACCAGCTCTTGACATGCCACGACGGTTACCGGAGACGGTTTCCTTCCTTCGGGACGTGGACACAGGTGCTGCATGGCTGTCGTCAGCTCGTGTCGTGAGATGTTGGGTTAAGTCCCGCAACGAGCGCAACCCTCGCCTTTAGTTGCCAGCATTCAGTTGGGCACTCTAAAGGGACTGCCGGTGATAAGCCGAGA--
>Otu000039
TGGTAGTCCACGCCGTAAACGATGAGTGCTAAGTGTTAGAGGGTTTCCGCCCTTTAGTGCTGCAGCTAACGCATTAAGCACTCCGCCTGGGGAGTACGGCCGCAAGGCTGAAACTCAAAGGAATTGACGGGGGCCCGCACAAGCGGTGGAGCATGTGGTTTAATTCGAAGCAACGCGAAGAACCTTACCAGGTCTTGACATCCTCTGACACTCCTAGAGATAGGACGTTCCCCTTCGGGGGACAGAGTGACAGGTGGTGCATGGTTGTCGTCAGCTCGTGTCGTGAGATGTTGGGTTAAGTCCCGCAACGAGCGCAACCCTTGATCTTAGTTGCCAGCATTCAGTTGGGCACTCTAAGGTGACTGCCGGTGACAAACCGGA--
>Otu000058
TGGTAGTCCACGCCCTAAACGATGCGAACTGGATGTTGGGAGCAACTTGGCTCTCAGTATCGAAGCTAACGCGTTAAGTTCGCCGCCTGGGAAGTACGGTCGCAAGACTGAAACTCAAAGGAATTGACGGGGGCCCGCACAAGCGGTGGAGTATGTGGTTTAATTCGATGCAACGCGAAGAACCTTACCTGGCCTTGACATCCACGGAACTTTCTAGAGATAGATTGGTGCCTTCGGGAACCGTGAGACAGGTGCTGCATGGCTGTCGTCAGCTCGTGTCGTGAGATGTTGGGTTAAGTCCCGCAACGAGCGCAACCCTTGTCCTTAGTTGCCAGCACGTAATGGTGGGAACTCTAAGGAGACCGCCGGTGACAAACCGGA--
>Otu000059
TGGTAGTCCACGCCCTAAACGATGTCAACTGGTTGTTGGGAGGGTTTCTTCTCAGTAACGAAGCTAACGCGTGAAGTTGACCGCCTGGGGAGTACGGCCGCAAGGTTGAAACTCAAAGGAATTGACGGGGACCCGCACAAGCGGTGGATGATGTGGTTTAATTCGATGCAACGCGAAAAACCTTACCTACCCTTGACATGTCTGGAATCCTGAAGAGATTTAGGAGTGCTCGAAAGAGAGCCAGAACACAGGTGCTGCATGGCCGTCGTCAGCTCGTGTCGTGAGATGTTGGGTTAAGTCCCGCAACGAGCGCAACCCTTATCATTAGTTGCTACGCAAGGGCACTCTAATGAGACTGCCGGTGACAAACCGGA
>Otu000060
TGGTAGTCCACGCCCTAAACGATGTCAACTGGTTGTTGGGAATTCACTTTCTCAGTAACGAAGCTAACGCGTGAAGTTGACCGCCTGGGGAGTACGGCCGCAAGGTTGAAACTCAAAGGAATTGACGGGGACCCGCACAAGCGGTGGATGATGTGGTTTAATTCGATGCAACGCGAAAAACCTTACCCACCTTTGACATGTACGGAATTTGTCAGAGATGACTTAGTGCTCGAAAGAGAGCCGTAACACAGGTGCTGCATGGCTGTCGTCAGCTCGTGTCGTGAGATGTTGGGTTAAGTCCCGCAACGAGCGCAACCCTTGTCATTAGTTGCTACATTTAGTTGGGCACTCTAATGAGACTGCCGGTGACAAACCGGA--
>Otu000110
TGGTAGTCCACGCCGTAAACGATGTCGACTAGCCGTTGGGATCCTTGAGATCTTAGTGGCGCAGCTAACGCGATAAGTCGACCGCCTGGGGAGTACGGCCGCAAGGTTAAAACTCAAATGAATTGACGGGGGCCCGCACAAGCGGTGGAGCATGTGGTTTAATTCGAAGCAACGCGAAGAACCTTACCTGGCCTTGACATGCTGAGAACTTTCCAGAGATGGATTGGTGCCTTCGGGAACTCAGACACAGGTGCTGCATGGCTGTCGTCAGCTCGTGTCGTGAGATGTTGGGTTAAGTCCCGTAACGAGCGCAACCCTTGTCCTTAGTTACCAGCACCTCGGGTGGGCACGCTAAGGAGACTGCCGGTGACAAACCGGA--
>Otu000112
TGGTAGTCCACGCCGTAAACGATGAGTGCTAGGTGTTAGACCCTTTCCGGGGTTTAGTGCCGTAGCTAACGCATTAAGCACTCCGCCTGGGGAGTACGACCGCAAGGTTGAAACTCAAAGGAATTGACGGGGGCCCGCACAAGCGGTGGAGCATGTGGTTTAATTCGAAGCAACGCGAAGAACCTTACCAGGTCTTGACATCCCTCTGACCGCTCTAGAGATAGAGTTTTCCTTCGGGACAGAGGTGACAGGTGGTGCATGGTTGTCGTCAGCTCGTGTCGTGAGATGTTGGGTTAAGTCCCGCAACGAGCGCAACCCCTATTGTTAGTTGCCATCATTCAGTTGGGCACTCTAGCGAGACTGCCGGTAATAAACCGGA--
>Otu000141
TGGTAGTCCACGCCGTAAACGATGAGTGCTAGGTGTTGGATCCTTTCCGGGATTCAGTGCCGCAGCTAACGCATTAAGCACTCCGCCTGGGGAGTACGACCGCAAGGTTGAAACTCAAAGGAATTGACGGGGGCCCGCACAAGCGGTGGAGCATGTGGTTTAATTCGAAGCAACGCGAAGAACCTTACCAGGTCTTGACATCCCGATGCTATTTCTAGAGATAGAAAGTTACTTCGGTACATCGGTGACAGGTGGTGCATGGTTGTCGTCAGCTCGTGTCGTGAGATGTTGGGTTAAGTCCCGCAACGAGCGCAACCCCTATTGTTAGTTGCCATCATTCAGTTGGGCACTCTAGCGAGACTGCCGGTAATAAACCGGA--
>Otu000186
TGGTAGTCCACGCCCTAAACGATGCGAACTGGATGTTGGGTGCAATTTGGCACGCAGTATCGAAGCTAACGCGTTAAGTTCGCCGCCTGGGGAGTACGGTCGCAAGACTGAAACTCAAAGGAATTGACGGGGGCCCGCACAAGCGGTGGAGTATGTGGTTTAATTCGATGCAACGCGAAGAACCTTACCTGGTCTTGACATCCACGGAACTTTCCAGAGATGGATTGGTGCCTTCGGGAACCGTGAGACAGGTGCTGCATGGCTGTCGTCAGCTCGGTGTCGTGAGATGTTGGGTTAAGTCCCGCAACGAGCGCAACCCTTGTCCTTAGTTGCCAGCACGTAATGGTGGGAACTCTAAGGAGACCGCCGGTGACAAACCGGA
>Otu000195
TGGTAGTCCACGCCCTAAACGATGTCAACTAGCTGTCGGGGTCTTCGGACTTTGGTAGCGCAGCTAACGCGTGAAGTTGACCGCCTGGGGAGTACGGTCGCAAGATTAAAACTCAAAGGAATTGACGGGGACCCGCACAAGCGGTGGATGATGTGGATTAATTCGATGCAACGCGAAAAACCTTACCTACCCTTGACATGTCTGAAATCCCGAAGAGATTTGGGAGTGCTCGAAAGAGAATCGGAACACAGGTGCTGCATGGCCGTCGTCAGCTCGTGTCGTGAGATGTTGGGTTAAGTCCCGCAACGAGCGCAACCCTTGTCATTAGTTGCTACGAAAGGGCACTCTAATGAGACTGCCGGTGACAAACCGGA--
>Otu000218
TGGTAGTCCACGCCGTAAACGATGAGTGCTAGTTGTCGGCATGCATGCATGTCGGTGACGCAGCTAACGCATTAAGCACTCCGCCTGGGGAGTACGGTCGCAAGATTAAAACTCAAAGGAATTGACGGGGGCCCGCACAAGCGGTGGAGCATGTGGTTTAATTCGAAGCAACGCGCAGAACCTTACCACCTTTTGACATGCCCGGACCGCCACAGAGATGTGGCTTTCCCTTCGGGGACTGGGACACAGGTGCTGCATGGCTGTCGTCAGCTCGTGTCGTGAGATGTTGGGTTAAGTCCCGCAACGAGCGCAACCCTCGCTGTTAGTTGCTACCAGGTTTGGCTGGGCACTCTAACAGGACCGCCGGTGGTAAGCCGGA--
>Otu000312
TGGTAGTCCACGCCCTAAACGATGTCAACTAGTTGTTGGGGATTCATTTTCTCAGTAACGTAGCTAACGCGTGAAGTTGACCGCCTGGGGAGTACGGTCGCAAGATTAAAACTCAAAGGAATTGACGGGGACCCGCACAAGCGGTGGATGATGTGGATTAATTCGATGCAACGCGAAAAACCTTACCTACCCTTGACATGCCACTAACGAAGCAGAGATGCATTAGGTGCCCGAAAGGGAAAGTGGACACAGGTGCTGCATGGCTGTCGTCAGCTCGTGTCGTGAGATGTTGGGTTAAGTCCCGCAACGAGCGCAACCCTTGTCTCTAGTTGCTACGCAAGAGCACTCTAGAGAGACTGCCGGTGACAAACCGGA--
>Otu000334
TGGTAGTCCATGCCGTAAACGTTGGGAACTAGATGTGGGGGCCATTCCACGGTCTCCGTGTCGCAGCTAACGCATTAAGTTCCCCGCCTGGGGAGTACGGCCGCAAGGCTAAAACTCAAAGGAATTGACGGGGGCCCGCACAAGCGGCGGAGCATGCGGATTAATTCGATGCAACGCGAAGAACCTTACCAAGGCTTGACATATACCGGAAACGTCCAGAGATGGTCGCCCCGCAAGGTCGGTATACAGGTGGTGCATGGTTGTCGTCAGCTCGTGTCGAGAGATGTTGGGTTAAGTCCCGCAACGAGCGCAACCCTCGTTCTATGTTGCCAGCACGTTATGGTGGGAACTCATAGGAGACTGCCGGGGTCAACTCGGA--
>Otu000470
TGGTAGTCCACGCCGTAAACGATGAGAGCTAGTTGTCGGCACGCATGCGTGTCGGTGACGCAGCTAACGCATTAAGCTCTCCGCCTGGGGAGTACGGTCGCAAGATTAAAACTCAAAGGAATTGACGGGGGCCCGCACAAGCGGTGGAGCATGTGGTTTAATTCGAAGCAACGCGCAGAACCTTACCACCTTTTGACATGCCCGGATCACTCCAGAGATGGAGCTTTCCCTTCGGGGACCGGTGCACAGGTGCTGCATGGCTGTCGTCAGCTCGTGTCGTGAGATGTTGGGTTAAGTCCCGCAACGAGCGCAACCCTCGCCTTTAGTTGCCACCATTTAGTTGGGAACTCTAAAGGGACTGCCGGTGCTAAGCCGGA
>Otu000693
TGGTAGTCCACGCCCTAAACGATGGATACTAGGCGTAAGAGGTATCGACCCCTCTTGTGCCGCAGCTAACGCATTAAGTATCCCGCCTGGGGAGTACGGCCGCAAGGTTGAAACTCAAATGAATTGACGGGGACCCGCACAAGCGGTGGAGCATGTGGATTAATTCGATACTAACCGAAGAACCTTACCCAGACTTGACATCGATCGCAAGCCTAAGAAATTAGGCCCTCTCCCACAAGGAGACGTGAAGACACTTGTTGCATGGCTGTCGTCAGCTCGTGCCGTGAGGTGTACGGTTAAGTCCGCCAACGAGCGCAACCCTCGTCCTGTGTTACCAGCATGAAAGATGGGGACTCACAGGAGACCGCCGGTGTAAGCCGGA--
>Otu000881
TGGTAGTCCATGCCGTAAACGGTGGGCGCTAGGTGTGGGGTTCCTTCCACGGGCTCCGCGCCGTAGCTAACGCATTAAGCGCCCCGCCTGGGGAGTACGGCCGCAAGGCTAAAACTCAAAGAAATTGACGGGGGCCCGCACAAGCGGCGGAGCATGTGGATTAATTCGATGCAACGCGAAGAACCTTACCTGGGCTTGACATATAGAGGATCGCTACAGAGATGTGGTTTCCCTTGTGGCTTCTATACAGGTGGTGCATGGTTGTCGTCAGCTCGTGTCGTGAGATGTTGGGTTAAGTCCCGCAACGAGCGCAACCCTTGTCTTATGTTGCCAGCACGTTATGGTGGGGACTCGTGAGAGACTGCCGGGGTCAACTCGGA--

## Sheet: Fungi_blast
OTUGenus	Taxa	OTU	Blast_ITS_DB	Query cover	Percentage identity	Blast_NR_DB	Query cover2	Percentage identity3	Blast_NR_Second_Hit	Query cover4	Percentage identity5	LabelToUse
o__Helotiales_unclassified_FITS2_Otu00008	FITS2	Otu00008	Populomyces barnardiae	97	86.3	Tricellula aquatica	100	100				Tricellula
g__Paraphoma_FITS2_Otu00010	FITS2	Otu00010	Paraphoma ledniceana	100	100	Paraphoma chrysanthemicola	100	100				Paraphoma
g__Alternaria_FITS2_Otu00011	FITS2	Otu00011	Alternaria doliconidium	100	100	Alternaria alternata	100	100				Alternaria
g__Mycocentrospora_FITS2_Otu00013	FITS2	Otu00013	Phaeomycocentrospora xinjangensis	100	94.9	Mycocentrospora sp.	100	100				Mycocentrospora
g__Alternaria_FITS2_Otu00015	FITS2	Otu00015	Alternaria tellustris	100	99.35	Alternaria sp.	100	99.35				Alternaria
g__Plectosphaerella_FITS2_Otu00016	FITS2	Otu00016	Plectosphaerella cucumerina	100	99.4	Plectosphaerella cucumerina	100	100				Plectosphaerella
g__Aureobasidium_FITS2_Otu00022	FITS2	Otu00022	Aureobasidium intercalariosporum	100	98.05	Aureobasidium pullulans	100	100				Aureobasidium
g__Desmococcus_FITS2_Otu00025	FITS2	Otu00025	NA	NA	NA	Pseudostichococcus monallantoides	100	100	Desmococcus spinocystis	100	98.91	Desmococcus
o__Helotiales_unclassified_FITS2_Otu00027	FITS2	Otu00027	Rhexocercosporidium senecionis	100	93.15	Cadophora yulongensis	97	94.41				Rhexocercosporidium
g__Herpotrichia_FITS2_Otu00028	FITS2	Otu00028	Stagonosporopsis ailanthicola	100	100	Stagonosporopsis stuijvenbergii	100	100				Herpotrichia
g__Stagonosporopsis_FITS2_Otu00035	FITS2	Otu00035	Stagonosporopsis valerianellae	100	100	Stagonosporopsis valerianellae	100	100				Stagonosporopsis
g__Dioszegia_FITS2_Otu00036	FITS2	Otu00036	Dioszegia takashimae	77	94.23	Dioszegia takashimae	77	94.23				Dioszegia
g__Gibberella_FITS2_Otu00039	FITS2	Otu00039	Verrucaria juankoskiensis	100	94.3	Verrucaria danica	100	94.94				Gibberella
g__Vishniacozyma_FITS2_Otu00041	FITS2	Otu00041	Leptosphaeria irregularis	100	98.1	Leptosphaeria conoidea culture	100	100				Vishniacozyma
g__Paulisebacina_FITS2_Otu00051	FITS2	Otu00051	NA	NA	NA	Sebacinaceae sp.	100	94.57				Paulisebacina
f__Phaeosphaeriaceae_unclassified_FITS2_Otu00072	FITS2	Otu00072	Parastagonospora novozelandica	100	100	Parastagonospora novozelandica	100	100				Parastagonospora
g__Leucosporidium_FITS2_Otu00078	FITS2	Otu00078	Leucosporidium escuderoi	100	96.73	Leucosporidium fragarium	100	97.18				Leucosporidium
g__Sordaria_FITS2_Otu00096	FITS2	Otu00096	Jeremyomyces labinae	100	89.17	Phaeosphaeria sp.	100	100				Sordaria
g__unclassified_Rhizophydiales_FITS2_Otu00126	FITS2	Otu00126	Cystofilobasidium macerans	100	99.57	Cystofilobasidium macerans	100	100				Cystofilobasidium
g__Dioszegia_FITS2_Otu00132	FITS2	Otu00132	NA	NA	NA	Prasiolales sp.	100	100				Dioszegia
f__Helotiales_fam_Incertae_sedis_unclassified_FITS2_Otu00140	FITS2	Otu00140	Knufia tsunedae	92	93.88	uncultured Knufia	100	100				Knufia
g__Neoascochyta_FITS2_Otu00229	FITS2	Otu00229	[Candida] boidinii	12	100	Desmochloris mollenhaueri	94	92.09				Neoascochyta
g__Verrucaria_FITS2_Otu00240	FITS2	Otu00240	Ramularia collo-cygni	100	100	Ramularia collo-cygni	100	100				Verrucaria
f__Phaeosphaeriaceae_unclassified_FITS2_Otu00243	FITS2	Otu00243	Septoriella hollandica	98	94.7	Sclerostagonospora sp.	100	100				Sclerostagonospora
c__Agaricomycetes_unclassified_FITS2_Otu00269	FITS2	Otu00269	Preussia polymorpha	100	93.46	Preussia sp.	100	99.35				Preussia
g__unclassified_Rhizophydiales_FITS2_Otu00299	FITS2	Otu00299	Mrakia aquatica	100	97.84	Mrakia aquatica	100	100				Mrakia
g__unclassified_Olpidiaceae_FITS2_Otu00366	FITS2	Otu00366	NA	NA	NA	Heterochlamydomonas callunae	100	99.34				NA
g__Tetracladium_FITS2_Otu00397	FITS2	Otu00397	NA	NA	NA	Pseudochlorella pringsheimii	100	95.44				Tetracladium
g__Acremonium_FITS2_Otu00450	FITS2	Otu00450	NA	NA	NA	Trebouxia decolorans	100	100				Acremonium
g__Fusarium_FITS2_Otu00480	FITS2	Otu00480	Keissleriella caraganae	100	92.81	Keissleriella cladophila	100	100				Fusarium
p__Chytridiomycota_unclassified_FITS2_Otu00681	FITS2	Otu00681	NA	NA	NA	Desmochloris halophila	100	87.78				NA
g__unclassified_Spizellomycetales_FITS2_Otu00869	FITS2	Otu00869	NA	NA	NA	uncultured Chytridiomycota	100	99.21				NA
g__Penicillium_FITS2_Otu01246	FITS2	Otu01246	Paraloratospora camporesii	92	91.37	Parastagonospora sp.	100	100				Penicillium

## Sheet: Fungi_fasta
>Otu00008
TCACCCCTCAAGCTCAGCTTGGTGTTGGGGCCTGCCCGTCACAGGGCAGCCCTTAAAAGCAGTGGCGGTGCCATCTGGCTCTACGCGTAGTAATACTCCTCGCGACAGAGTCCCGGTGGTGTCCTGCCAGAACCCCCCATATTTTTAAT
>Otu00010
GTACCTTCAAGCTTTGCTTGGTGTTGGGTGTTTGTCCTGAGGGACTCGCCTTAAAGTAATTGGCAGCCAGTGTTTGGTTTTGAAGCGCAGCACAAGTCGCGATTCAAAGCTATACGCCCGCTTCCACAAGCCTTTTTCAC
>Otu00011
GTACCCTCAAGCTTTGCTTGGTGTTGGGCGTCTTGTCTCTAGCTTTGCTGGAGACTCGCCTTAAAGTAATTGGCAGCCGGCCTACTGGTTTCGGAGCGCAGCACAAGTCGCACTCTCTATCAGCAAAGGTCTAGCATCCATTAAGCCTTTTTTTCAAC
>Otu00013
GTACCCTCAAGCTCTGCTTGGTGTTGGGTGTTTGTTCCGCCTCTGTGTGTGAACTCGCCTTAAAACAATTGGCAGCCGGCGTACTTGTTTCGGAGCGCAGCACATTTTTGCGCTTTAGACCAATGTACAGCGGCATCCAAGAAGCCTTCTTTAACGC
>Otu00015
GTACCCTCAAGCTTTGCTTGGTGTTGGGCGTCTTGTCTCCAGTCCGCTGGAGACTCGCCTTAAAGTCATTGGCAGCCGGCCTACTGGTTTCGGAGCGCAGCACAAGTCGCGCTCTTTTCCAGCCAAGGTCAGCGTCCAACAAGCCTTTTTTCAAC
>Otu00016
CAACCCTCGAGCCCCCGTGGCCCGGCGTTGGGGATCTGCCACGGCAGGCCCCTAAAACCAGTGGCGGACCCGAAGGCCCTCTCCTTTGCGCAGTAGCATCAGCCTCGCATTGGGATCCCTCGGCGTCCTGCCTCTAAACCCCCCACAAGTCCGCTCCGGCGGCACCAA
>Otu00022
CACCACTCAAGCTATGCTTGGTATTGGGCGTCGTCCTTAGTTGGGCGCGCCTTAAAGACCTCGGCGAGGCCACTCCGGCTTTAGGCGTAGTAGAATTTATTCGAACGTCTGTCAAAGGAGAGGAACTCTGCCGACTGAAACCTTTATTTTTCTA
>Otu00025
AACGCATATTGCGCCCACGGCCTCGGCTAAGGGCATGCCTGTCTCAGCGTCCGCTCACCCCCTCGCCCACCCTTTCCTTGTTGAAAGCGGTTTGGACGGATGTGGCCGTCTCGCTCTCCTTTTGAAGAGCGGGTCGGCTGAAGCGCAGGGCTCGCGGCGGGACCCCATTCGATCGGGGCGCCAGCATGGTAGGTGGCTCACGCTCACATACTAGCTGTCGTCTCCCATATCACCGGGCGCTCCGCCTGCTGCCACAGCAGGAAACCAATCAAAC
>Otu00027
TAACCACTCAAGCGCGGCTTGGTATTGGGGTTCGCATCTCGCGGCCCTTAAAATCAGTGGCGGTGCCTGTCGGCTCTACGCGTAGTAATACTCCTCGCGATTGAGTCCGGCAGGTTGCTTGCCAACAACCCCCAATTTTTACA
>Otu00028
GTACCTTCAAGCTCTGCTTGGTGTTGGGTGTTTGTCTCGCCTCTGCGCGCAGACTCGCCTCAAAACAATTGGCAGCCGGCGTATTGATTTCGGAGCGCAGTACATCTCGCGCTTTGCACTCATAACGACGACGTCCATAAAGTACATTTTTTACAC
>Otu00035
GTACCTTCAAGCTCTGCTTGGTGTTGGGTGTTTGTCTCGCCTCTGCGCGCAGACTCGCCTCAAAACGATTGGCAGCCGGCGTATTGATTTCGGAGCGCAGTACATCTCGCGCTTTGCAACCAGACGACGACGTCCAAAAAGTACATTTTTACAC
>Otu00036
TAAATCTCACCCTTACTGTTTGTTCAGTGTGTGGTGCTTTGGGCGTCTTGCCGTTTACTCTGGCTCGCCTTAAATGTCTAAGTGGAATGTGTCATAAGTCTTTTCGCAACCCTCCACTCTAATCACAACTTTATA
>Otu00039
TCAACCCTCAAGCCTGGCTTGCTGTTGGGTCGCACCGTTGAGATAGGCGGTGGACCCGAAAGATAATGGCAGAGCCCGCGGGGACCCTGGATGCAACGAGCCTTGCAGCACGCATCTGGACGGTCCTCCGGCTCGGTCTTAACCAAATCTACTTCTCA
>Otu00041
GTACCCTCAAGCTTTGCTTGGTGTTGGGTGTTTGTCCCGCGCTCTTTTGCGCGAGACTCGCCTTAAATCAATTGGCAGCCGGCATGTTAGCCTGGAGCGCAGCACATTTTGCGCCCCTTGCTTGCTTGTGTTGGCCCCCATCAAGTCCATATATTTGC
>Otu00051
TAATCTCACACCAACTTTTATTAGTTGGAGGTGGACTTGGAGGTTGCTGTTGAAAAACAGCTCTTCTTAAATGGATTAGTGCGGCTCTGGTTGGACTTAAGCCCGATGTAATAAAAATTTCATTGTGGTGTCTAATCAAATCGAGTGTGTGCTTCTAACCGTCTTCGGACAAACTACTTGACA
>Otu00072
GTACCTTCAAGCTTTGCTTGGTGTTGGGTGTTTGTCCTCTCCCTGGTGTTAGGACTCGCCTTAAAACAATTGGCAGCCAGTGTTTTGGTATTGAAGCGCAGCACAAGTCGCGATTCTAACCTAATAACACTTGCGTCCACAAGCCTTTTTTCAC
>Otu00078
ACTCTTCAACCCACCAGTTTCTTGTAGACTGATTGGTGTTTGGATTTTGAGCGTTGCTATTCCTCGGAATCAGCTCGTTCGTAATATATTAGCATCTCTAATTCGAACTCGGATTGACTCAGTGTAATAGACTATTCGCTGAGGACACGCTCTTTTGTAGTGTGGCCGAATGAGATCTCAGTAGAAGCTTCCAACTACTTTAGTCAACTTTAG
>Otu00096
GTACCCTCAAGCTATGCTTGGTGTTGGGTGTTTGTCCTCTCCTTTTGCGATTGGACTCGCCTCAAAGACATTGGCAGCCAGTGTATTGGTCTTGAAGCGCAGCACATTTTGCGATTCTTGCTGATAATCACTAGCATCCAGTAAGCCTCTTTATCAC
>Otu00126
AACTCTCACCTCCAGCCTTCTTTAATTAGAGGTGTTGGGGCGTGGACGTGAGTGCTGCTGGTGCCCTGGTTGCATCGGCTCACTTGAAATACATTAGCTGAATCCTCTAGAGGTGGTTCTACTCGACGTGATAAGATCTCCGTCGAGGACAGTGCAACTTGTTGTGCTGGCCGCCGCTAGCTGTTGATACGCTTCTAATTAGCGCAGACTTCGAGTGCTGGCAACTTTTGACA
>Otu00132
AACGCATATTGCGCTCGAGACTTCGGTCGAGAGCATGCCTGTCTCAGCGTCGGCTCACCCCTCGCCCACCCTTTCCCTCTCAACGATGGAGAGGCGCCTGGACGGACGTGGCCGTCTCGCTCCCGGCTTGGCAACAAGCACGGGGAGCGGGTCGGCTGAAGTGCAGGGCCCGCGGCGCGACCCGGACGAGAGGGCGCCAGCATGGTAGGTGGCTCAACGCTGCATGCCGCTGTCGCCTTTCATCTCGGCCCGATCAAGGTCGCATCAATCGTCCGCACGGCCACCAAGCAGGAACAGTCACCCGGCCGCAGCGATGCGGCAGGCGACTCAACC
>Otu00140
TCCCCCCTCAAACCCCGTGTTTGGTGTTAGACCCAAGTTGTGTGAACAACTGGTCTCAAAGACAATGACGGCGTCCGTGGGACCCTCGGTGCAACGAGCTTTTAGGAGCACGCGCTGAGTTTCAAGGACCCTCCGGGCCGGTCTCCTATTTATCATCAA
>Otu00229
GTACTGCGTGAATCATCGAATCTTTGAACGCATATTGCGGTCGAGGCTTAGGCCAAGACCATGTCTGCCTCAGCGTCGGAGTAACCCCTCACCCCCTTCACAAAAGGGAGTGGACCTGGCCTCCCCAGTGCTCAGCCACTGGGCTGGCTAAAGCGCAGAGGTACGGCACGGACCTGTATGGCACCAGCAAGGTAGGTAGCTCGTCTACTCCAGCTGATGCTTTGGGCCCGCCCGCCGCACCCGCAGGAACCCCCCCTCTT
>Otu00240
CACCACTCAAGCCTCGCTTGGTATTGGGCGTCGCGAGTCTCTCGCGCGCCTCAAAGTCTCCGGCTGAGCGGTTCGTCTCCCAGCGTTGTGGCAACTATTCGCAGAGGAGTTCGAGTCGTCGCGGCCGTTAAATCTTTCAAA
>Otu00243
GTACCCTCAAGCTCTGCTTGGTGTTGGGTGTTTGTCCTCTCCTTTGCGATTGGACTCGCCTTAAAATAATTGGCAGCCAGTGTTTTGGTATTGAAGCGCAGCACAATTTGCGATTCTATCCGGTAATACTGGCGTCCATAAGCCTATTTTACAC
>Otu00269
AAACCTTCAAGCACTGCTTGGTGTTGGGTGCCTGTCCCGCCCCCGCGCGTGGACTCACCTCAAATCCATTGGCGGCCCTCACGTCGGCTTCGAGCGCAGCAGAAACGCGAACTCGTGGCCCGGCGGAGCGGCTCCCAGAAGCTACTCTCACCA
>Otu00299
AACTCTCACCCTTCAACTTTCTTAATAGTGGTTGCGGGCGTGGACTTGAGCGTTGCTGGTTTTTATTAACCGGCTCGCTTGAAATGAATTAGCAGATCCTTTTTGTAATCGGTTCCACTCGACGTGATAAGTATTTCGCCGAGGACATCTTAACGGATGGCCGAGATAAAGAAAGTCTTAGATCCGCTTCTAATTCTTAGCTTTACGCAAGTAAACTAAACCCATTTTATG
>Otu00366
AACGCATATTGCGCTCGAGGCTTCGGCCAAGAGCATGTCTGCCTCAGCGTCGGGTTAATCCTCACCATCCCATTCCCTGAATGTCATGGTGGATATGGCTTTCCCAGGCCTTGTGTCTGGGTTCGCTGAAGCACAGAGGTTGATGCATGGACCCGTTATGGGCCGCAACTGGGTAGGCAACTCGTTGCTTAATGCTTTAGTTGTTGGCTTGGGACTGTGCCGTCGACCCGAAATCAGGAAGGGCTTCGGCCCTATTAACCTTTATCTCGACCTGAGCTCAGGCAAGAACACCCGCTGAACTTAA
>Otu00397
AACGCATATTGCGCTCGAGACCCCGGTCGAGAGCATGTCTGGCTCAGCGTCGTTTCACCCACTCGCCACCTTTACCCTCTTTCCGAAGGGCGGTCTAGGAAGGCGGACCTGGCTTTCCCCGTGACTCTCTGGACGAACGGGGTCGGCTGAAGAACAGAGGCTTGAGCATGGCGCCGCACAATGGCAGCCGGCTTGGTAGGTGGCTCACGCTACATGCCGCCGGAGGCCGCAGCGCCGTGCTGTTAAGGCCCGCAGGAACCGACCCACCGAGGTCGGACACTCAAA
>Otu00450
AACGCAAATTGCGCTCGAGGCTTCGGCCAAGAGCATGTCTGCCTCAGCGTCGGCTACTACCCTCAACTAAGTTTCCTATCATTGATAGGGGATGCCAGTTGGATCTGGCCGTCCGGTTTACCTTTCAGGTTGCCGGTCAGCTGAAATACATTCACGCTCTGGGGGCTGCTTTCCTCGAAAGGCTACTTTCGAGGGGAGGTGAGTTCCGATTTGGTAGGTGACCTTTGCCGGTTGCATGCCTTCGTTGCCCGCTAAGCTTCCCAGTAGTCGTTGTGCAGGACGCCTTTTGGCTTTCGACCTGAGGTCAGGCAAGAACACCCGCTGAACTTAA
>Otu00480
ACACCCTCAAGCTCAGCTTGGTGTTGGGCGTCTGTCCCGCTTCGTGCGCGGACTCGCCTCAAATGCATTGGCAGCGGTCTTGCCAGCTTCTCGCGCAGCACATTGCGCTTCTAGAGGCTTTGGCGGATCGGCGTCCATCAAGTACACCCACA
>Otu00681
AACGCATATTGCGGTCGAGGCTTCGGCCAAGACCATGTCTGCCTCAGCGTCGGAGTAACCCCTCACCCCCCTCCCAGAGAGTGTCTCTGGGCGGCCGGGGTGGACTTGGCCTCCCCAGCAGCGCGGCTCTCCTCGAGCGGCTGCTGGGCTGGCTGAAATGTAGAGGTACGGCACGGACCTGTATGGCACCAGCAAGGTAGGTAGCTCGTCTACTCCAGCTGATGCTTTGGGCCCGCCCGCCGCACCCGCAGGAACCCCACTCACTT
>Otu00869
TAAAACTCACAACCCTTGGCGGCGTCTGTCGCCTGGGTGCGTGGATATGAGCGTATTGGCTGCTGGAATTGACTTTCACAAACCCAATCGCTTTAAAATGATTTTGTACGTAGCCCTCGTCTTCTTTTGTGGGCTGCCAACAGTGCGACAGTTTTTAACAGTTCATTTTTGGCCGTCACCATGAGAATAGCGAGGCATGTATTTCTACCTCCATATACTTGGCATTTGTTGGCGCAAGCCCAATGCCTTGAA
>Otu01246
GTACTCTCAAGCCTTGCTTGGTGTTGGGTGTTTGTCTATGCTTAGCCTAGACTCGCCTTAAATATATTGGCAGCCGGTATACTGGCTTGAAGCGCAGCACAATTGCAATTCAGGTTGGCTTATTAGCATCCATAAAGATCATCAACAC

## Sheet: NFEuk_blast
Column1	Column2	Column3	Column4	Column5	Column6	Column7	Column8	Column9	Column10	Column11	Column12	Column13	Column14
OTUGenus	Taxa	OTU	Blast_NR	Query cover	Percentage identity	NR_TypeMaterial	Query cover	Percentage identity	NR_TypeMaterial_secondHit	Query cover	Percentage identity		LabelToUse
Oomycota_X_unclassified_PV9_Otu00002	PV9	Otu00002	Hyaloperonospora parasitica	100	99.7								Hyaloperonospora
Rhogostoma-lineage_unclassified_PV9_Otu00003	PV9	Otu00003	uncultured Cercozoa	100	99.4	Rhogostoma cylindrica	73	99.59	Rhogostoma epiphylla	73	99.18		Rhogostoma
Albugo_PV9_Otu00005	PV9	Otu00005	Albugo laibachii	100	100								Albugo
Klebsormidium_PV9_Otu00006	PV9	Otu00006	Klebsormidium flaccidum	100	100								Klebsormidium
Chloroidium_PV9_Otu00008	PV9	Otu00008	Chloroidium lichenum	100	100								Chloroidium
Pseudendocloniopsis_PV9_Otu00024	PV9	Otu00024	Planophila laetevirens	100	100								Planophila
Pythium_PV9_Otu00029	PV9	Otu00029	Pythium apiculatum	100	97.6								Pythium
Chloromonas_PV9_Otu00079	PV9	Otu00079	Chloromonas augustae	100	99.39								Chloromonas
Spumella_PV9_Otu00105	PV9	Otu00105	Spumella similis	100	100								Spumella
Oomycota_X_unclassified_PV9_Otu00362	PV9	Otu00362	Phytophthora syringae	100	98.8								Phytophthora
Glissomonadida_unclassified_PV9_Otu00808	PV9	Otu00808	uncultured Cercozoa	100	99.69	Thaumatomonas coloniensis	97	88.15					Thaumatomonas
Hyaloperonospora_PV9_Otu01157	PV9	Otu01157	Hyaloperonospora sp	100	99.4								Hyaloperonospora
Oomycota_X_unclassified_PV9_Otu02258	PV9	Otu02258	Albugo laibachii	100	97.6								Albugo
Oomycota_X_unclassified_PV9_Otu02596	PV9	Otu02596	Albugo laibachii	100	99.52								Albugo

## Sheet: NFEuk_fasta
>Otu00002
TTAGATGTTCTGGGCCGCACGCGCGCTACACTGATGCGTTCAACGAGTATACAACCTTGATCGATAGGTCTGGGTAATCTTTTGAATGCGCATCGTGATAGGGATAGACTGTTGCAATTTTCAGTCTTGAACGAGGAATTCCTAGTAAACGCAAGTCATCAGCTTGCATTGATTACGTCCCTGCCCTTTGTACACACCGCCCGTCGCACCTACCGATTGAATGACTCGGTGAAAAATTGGGACTGTTAGTTTGTTTGCTTTATTGCGAGTGGATTGATGGGAACTTTTTTAAACCTCGCCATTTAGAGGAAGGTGAAGTCGTAACAAGGTTTCC--
>Otu00003
TTAGATGTTCTGGGCCGCACGCGCGCTACACTGATCGGTTCATCGAGCATAAAACCTTGACTGATAAGTCTGGGTAATCTTTTGAAAACCGGTCGTGCTGGGGATAGATCATTGCAATTATTGATCTTCAACGAGGAATTCCTAGTAAACGCGAGTCATCAACTCGCATTGATTACGTCCCTGCCCTTTGTACACACCGCCCGTCGCTACTACCGATTGAATGGCTTAGTGAGCTCTCTGGACTGTTGTGTGTTAGGGGCAACTCTGACACGCAAACGGGAAGGAGATCAAACTTGATCATTTAGAGGAAGTAAAAGTCGTAACAAGGTTTCC--
>Otu00005
TTAGATGTTCTGGGCCGCACGCGCGCTACACTGATGCGTTCAACGAGTTTAAAACCTTGACCGATAGGTCTGGGTAATCTTGTGAATGCGCATCGTGCTAGGGATAGATTGTTGCAATTTTCAATCTTGAACGAGGAATTCCTAGTAAATGCAAGTCATCAGCTTGCGTTGATTACGTCCCTGCCCTTTGTACACACCGCCCGTCGCACCTACCGATTGAATGACTCGGTGAAGAATTGGGACCGTGAATCTGTTTGCTTCATTGCGAATGGATTTGTGGGAACTTTTTTTAACCTCGCCATTTAGAGGAAGGTGAAGTCGTAACAAGGTTTCC--
>Otu00006
TTAGATGTTCTGGGCCGCACGCGCGCTACACTGATGAATTCAACGAGTTTATAACCTGGGCCGAAAGGTCTGGGTAATCTTGTGAAATTTCATCGTGATGGGGATAGATTATTGCAATTATTAATCTTCAACGAGGAATTCCTAGTAAGCGCGAGTCATCAGCTCGCGTTGATTACGTCCCTGCCCTTTGTACACACCGCCCGTCGCTCCTACCGATTGAATGATCCGGTGAAGTTTTCGGATTGCGGCTACTCCGGCGGTCCGCCGCCGAAGAAGCTGTGAGAAGTTCATTAAACCTTATCATTTAGAGGAAGGAGAAGTCGTAACAAGGTTTCC--
>Otu00008
TTAGATGTTCTGGGCCGCACGCGCGCTACACTGACGCAATCAACGAGCCCAGCCTTGGTCGAGAGACCCGGGTAATCTTGTAAACTGCGTCGTGATGGGGCTAGACTCTTGCAATTATTAGTCTTCAACGAGGAATGCCTAGTAAGCGCGAGTCATCAGCTCGCGTTGATTACGTCCCTGCCCTTTGTACACACCGCCCGTCGCTCCTACCGATTGGATGTGCTGGTGAAGCCCTAGGACTGGCGGCCTTTGGCGGTTCTCCGCCGACGGTCGCCGGGAATTCGGTTAAACCCTCCCATCTAGAGGAAGGAGAAGTCGTAACAAGGTCTCC--
>Otu00024
TTAGATGTTCTGGGCCGCACGCGCGCTACACTGATACGTTCAACAAGTTCCTTGGTCGAAAGGTCCGGGTAATCTTTGAAACCGTATCGTGATGGGGATAGAACATTGCAATTATTGTTCTTCAACGAGGAATGCCTAGTAAGCGTGAGTCATCATCTCGCGTTGATTACGTCCCTGCCCTTTGTACACACCGCCCGTCGCTCCTACCGATTGAACGTGCTGGTGAAGACATCGGATTGGCTGTTTCGCTAGGTTTCCTAGCGTCACAGCTGAGAAGTTGTTTAAACCCTCCCGTTTAGAGGAAGGAGAAGTCGTAACAAGGTTTCC--
>Otu00029
TTAGATGTTCTGGGCCGCACGCGCGCTACACTGATGCGTTCAACGAGTGTATAACCTTGATCGATAGGTCTGGGTAATCTTCTGAAAGCGCATCGTGCTAGGGATAGATTGTTGCAATTCTCAATCTTGAACGAGGAATTCCTAGTAAATGCAAGTCATCAGCTTGCGTTGATTACGTCCCTGCCCTTTGTACACACCGCCCGTCGCACCTACCGATTGAATGACTCGGTGAGAAATTGGGACCGCGAGCCTGTTTGCTTCATTGCGAGCGGATTCGTGGAAACTTTTTCTAACCTCGCCATTTAGAGGAAGGTGAAGTCGTAACAAGGTTTCC
>Otu00079
TTAGATGTTCTGGGCCGCACGCGCGCTACACTGATGCGTTCAACGAGCCTATCCTTGGCCGAGAGGTCCGGGTAATCTTGAAAACCGCATCGTGATGGGGATAGATTATTGCAATTATTAGTCTTCAACGAGGAATGCCTAGTAAGCGCGAGTCATCAGCTCGCGTTGATTACGTCCCTGCCCTTTGTACACACCGCCCGTCGCTCCTACCGATTGGATGTGCTGGTGAAGTGTTCGGATCGGCTTCAGTCGGTGGCAACACTGTCTGATGTCGAAAAGATCATTGAACCCTCCCATCTAGAGGAAGGAGAAGTCGTAACAAGGTTTCC--
>Otu00105
TTAGATGTCCTGGGCCGCACGCGCGCTACACTGACACACGCAGCGAGTCTTCCTTGTCCGAAAGGTCTGGGTAATCTTGTAAATGTGTGTCGTGATAGGGATAGATTATTGCAATTATTAATCTTGAACGAGGAATTCCTAGTAAATGCGGGTCATCAGCTCGCGTTGATTACGTCCCTGCCCTTTGTACACACCGCCCGTCGCACCTACCGATTGAATGATTCGGTGAAACTTTCGGATCGTGGTCTGGACGCCTCACGGCGACTAGACCGTGAGAAGTTATTTAAACCTCATCATTTAGAGGAAGGTGAAGTCGTAACAAGGTTTCC--
>Otu00362
TTAGATGTTCTGGGCCGCACGCGCGCTACACTGATGCGTTCAACGAGTATACAACCTTGATCGACAGGTCTGGGTAATCTTGTGAATGCGCATCGTGCTAGGGATAGACTGTTGCAATTTTCAGTCTTGAACGAGGAATTCCTAGTAAATGCAAGTCATCAGCTTGCGTTGATTACGTCCCTGCCCTTTGTACACACCGCCCGTCGCACCTACCGATTGAATGACTCGGTGAAAAATTGGGACCGTTAGTCCGCTTGCTTCATTGCGAGTGAATTGATGGGAACTTTTTTAAACCTCGCCATTTAGAGGAAGGTGAAGTCGTAACAAGGTTTCC
>Otu00808
TTAGATGTTCTGGGCCGCACGCGCGCTACACTGATGCGTTCATCGAGCTTCTTCCTAGACCGGAAGGTCCGGGGAATCTTTTCAACACGCATCGTGCTGGGGATAGATTATTGTAATTATTAATCTTCAACGAGGAATTCCTAGTAAACGCGAGTCATCAGCTCGCATTGATTACGTCCCTGCCCTTTGTACACACCGCCCGTCGCTACTACCGATTGAATGGATTAGTGAGCTTCACGGATTGCTGCGTGGTAGGTTTCTATCACGCAACGAGAAGTGAATCAAACTTGCTCATTTAGAGGAAGTAAAAGTCGTAACAAGGTTTCC--
>Otu01157
TTAGATGTCCTGGGCCGCACGCGCGCTACACTGATGCGTTCAACGAGTTTAAAACCTTGACCGATAGGTCTGGGTAATCTTTTGAATGCGCATCGTGATAGGGATAGACTGTTGCAATTTTCAGTCTTGAACGAGGAATTCCTAGTAAACGCAAGTCATCAGCTTGCATTGATTACGTCCCTGCCCTTTGTACACACCGCCCGTCGCACCTACCGATTGAATGACTCGGTGAAAAATTGGGACTGTTAGTCTGATTGCTTAATTGCGAGCGGATTGATGGGAACTTTTTTTAACCTCGCCATTTAGAGGAAGGTGAAGTCGTAACAAGGTTTCC--
>Otu02258
TTAGATGTTCTGGGCCGCACGCGCGCTACACTGATGCGTTCAACGAGTATACAACCTTGATCGATAGGTCTGGGTAATCTTTTGAATGCGCATCGTGATAGGGATAGACTGTTGCAATTTTCAGTCTTGAACGAGGAATTCCTAGTAAATGCAAGTCATCAGCTTGCGTTGATTACGTCCCTGCCCTTTGTACACACCGCCCGTCGCACCTACCGATTGAATGACTCGGTGAAGAAATGGGACCGTGAATCTGTTTGCTTCATTGCGAATGGATTTGTGGGAACTTTTTTTAACCTCGCCATTTAGAGGAAGGTGAAGTCGTAACAAGGTTTCC--
>Otu02596
TTAGATGTTCTGGGCCGCACGCGCGCTACACTGATGTATTCAACGAGGAATTCCTAGTAAATGCAAGTCATCAGCTTGCGTTGATTACGTCCCTGCCCTTTGTACACACCGCCCGTCGCACCTACCGATTGAATGACTCGGTGAAGAATTGGGACCGTGAATCTGTTTGCTTCATTGCGAATGGATTTGTGGGAACTTTTTTTAACCTCGCCATTTAGAGGAAGGTGAAGTCGTAACAAGGTTTCC

## Sheet: Labels_Used_InFig5
OTUGenus	Taxa	OTU	OTUShortName	LabelToUse
Sphingomonas_BV5_Otu000002	BV5	Otu000002	Otu2	Sphingomonas
Methylobacterium-Methylorubrum_BV5_Otu000003	BV5	Otu000003	Otu3	Methylobacterium
Duganella_BV5_Otu000004	BV5	Otu000004	Otu4	Duganella
Pseudomonas_BV5_Otu000005	BV5	Otu000005	Otu5	Pseudomonas
Pseudomonas_BV5_Otu000006	BV5	Otu000006	Otu6	Pseudomonas
Flavobacterium_BV5_Otu000009	BV5	Otu000009	Otu9	Flavobacterium
Brevundimonas_BV5_Otu000010	BV5	Otu000010	Otu10	Brevundimonas
Rathayibacter_BV5_Otu000011	BV5	Otu000011	Otu11	Rathayibacter
Buchnera_BV5_Otu000012	BV5	Otu000012	Otu12	Buchnera
Oxalobacteraceae_unclassified_BV5_Otu000013	BV5	Otu000013	Otu13	Pseudoduganella
Allorhizobium-Neorhizobium-Pararhizobium-Rhizobium_BV5_Otu000014	BV5	Otu000014	Otu14	Rhizobium
Sphingomonas_BV5_Otu000015	BV5	Otu000015	Otu15	Sphingomonas
Methylobacterium-Methylorubrum_BV5_Otu000016	BV5	Otu000016	Otu16	Methylobacterium
Oxalobacteraceae_unclassified_BV5_Otu000017	BV5	Otu000017	Otu17	Janthinobacterium
Comamonadaceae_unclassified_BV5_Otu000018	BV5	Otu000018	Otu18	Acidovorax
Allorhizobium-Neorhizobium-Pararhizobium-Rhizobium_BV5_Otu000024	BV5	Otu000024	Otu24	Ferranicluibacter
Bosea_BV5_Otu000027	BV5	Otu000027	Otu27	Bosea
Aureimonas_BV5_Otu000033	BV5	Otu000033	Otu33	Aureimonas
Bacillus_BV5_Otu000039	BV5	Otu000039	Otu39	Bacillus
Xanthomonadaceae_unclassified_BV5_Otu000058	BV5	Otu000058	Otu58	Lysobacter
Pelomonas_BV5_Otu000059	BV5	Otu000059	Otu59	Inhella
Comamonadaceae_unclassified_BV5_Otu000060	BV5	Otu000060	Otu60	Xenophilus
Pseudomonas_BV5_Otu000110	BV5	Otu000110	Otu110	Pseudomonas
Streptococcus_BV5_Otu000112	BV5	Otu000112	Otu112	Streptococcus
Streptococcus_BV5_Otu000141	BV5	Otu000141	Otu141	Streptococcus
Xanthomonas_BV5_Otu000186	BV5	Otu000186	Otu186	Xanthomonas
Alcaligenaceae_unclassified_BV5_Otu000195	BV5	Otu000195	Otu195	Pigmentiphaga
Caulobacteraceae_unclassified_BV5_Otu000218	BV5	Otu000218	Otu218	Caulobacter
Cupriavidus_BV5_Otu000312	BV5	Otu000312	Otu312	Cupriavidus
Microbacteriaceae_unclassified_BV5_Otu000334	BV5	Otu000334	Otu334	Frigoribacterium
Caulobacteraceae_unclassified_BV5_Otu000470	BV5	Otu000470	Otu470	Caulobacter
Fimbriimonadaceae_ge_BV5_Otu000693	BV5	Otu000693	Otu693	Fimbriimonas
Lawsonella_BV5_Otu000881	BV5	Otu000881	Otu881	Lawsonella
o__Helotiales_unclassified_FITS2_Otu00008	FITS2	Otu00008	Otu8	Tricellula
g__Paraphoma_FITS2_Otu00010	FITS2	Otu00010	Otu10	Paraphoma
g__Alternaria_FITS2_Otu00011	FITS2	Otu00011	Otu11	Alternaria
g__Mycocentrospora_FITS2_Otu00013	FITS2	Otu00013	Otu13	Mycocentrospora
g__Alternaria_FITS2_Otu00015	FITS2	Otu00015	Otu15	Alternaria
g__Plectosphaerella_FITS2_Otu00016	FITS2	Otu00016	Otu16	Plectosphaerella
g__Aureobasidium_FITS2_Otu00022	FITS2	Otu00022	Otu22	Aureobasidium
g__Desmococcus_FITS2_Otu00025	FITS2	Otu00025	Otu25	Desmococcus
o__Helotiales_unclassified_FITS2_Otu00027	FITS2	Otu00027	Otu27	Rhexocercosporidium
g__Herpotrichia_FITS2_Otu00028	FITS2	Otu00028	Otu28	Herpotrichia
g__Stagonosporopsis_FITS2_Otu00035	FITS2	Otu00035	Otu35	Stagonosporopsis
g__Dioszegia_FITS2_Otu00036	FITS2	Otu00036	Otu36	Dioszegia
g__Gibberella_FITS2_Otu00039	FITS2	Otu00039	Otu39	Gibberella
g__Vishniacozyma_FITS2_Otu00041	FITS2	Otu00041	Otu41	Vishniacozyma
g__Paulisebacina_FITS2_Otu00051	FITS2	Otu00051	Otu51	Paulisebacina
f__Phaeosphaeriaceae_unclassified_FITS2_Otu00072	FITS2	Otu00072	Otu72	Parastagonospora
g__Leucosporidium_FITS2_Otu00078	FITS2	Otu00078	Otu78	Leucosporidium
g__Sordaria_FITS2_Otu00096	FITS2	Otu00096	Otu96	Sordaria
g__unclassified_Rhizophydiales_FITS2_Otu00126	FITS2	Otu00126	Otu126	Cystofilobasidium
g__Dioszegia_FITS2_Otu00132	FITS2	Otu00132	Otu132	Dioszegia
f__Helotiales_fam_Incertae_sedis_unclassified_FITS2_Otu00140	FITS2	Otu00140	Otu140	Knufia
g__Neoascochyta_FITS2_Otu00229	FITS2	Otu00229	Otu229	Neoascochyta
g__Verrucaria_FITS2_Otu00240	FITS2	Otu00240	Otu240	Verrucaria
f__Phaeosphaeriaceae_unclassified_FITS2_Otu00243	FITS2	Otu00243	Otu243	Sclerostagonospora
c__Agaricomycetes_unclassified_FITS2_Otu00269	FITS2	Otu00269	Otu269	Preussia
g__unclassified_Rhizophydiales_FITS2_Otu00299	FITS2	Otu00299	Otu299	Mrakia
g__unclassified_Olpidiaceae_FITS2_Otu00366	FITS2	Otu00366	Otu366	NA
g__Tetracladium_FITS2_Otu00397	FITS2	Otu00397	Otu397	Tetracladium
g__Acremonium_FITS2_Otu00450	FITS2	Otu00450	Otu450	Acremonium
g__Fusarium_FITS2_Otu00480	FITS2	Otu00480	Otu480	Fusarium
p__Chytridiomycota_unclassified_FITS2_Otu00681	FITS2	Otu00681	Otu681	NA
g__unclassified_Spizellomycetales_FITS2_Otu00869	FITS2	Otu00869	Otu869	NA
g__Penicillium_FITS2_Otu01246	FITS2	Otu01246	Otu1246	Penicillium
Oomycota_X_unclassified_PV9_Otu00002	PV9	Otu00002	Otu2	Hyaloperonospora
Rhogostoma-lineage_unclassified_PV9_Otu00003	PV9	Otu00003	Otu3	Rhogostoma
Albugo_PV9_Otu00005	PV9	Otu00005	Otu5	Albugo
Klebsormidium_PV9_Otu00006	PV9	Otu00006	Otu6	Klebsormidium
Chloroidium_PV9_Otu00008	PV9	Otu00008	Otu8	Chloroidium
Pseudendocloniopsis_PV9_Otu00024	PV9	Otu00024	Otu24	Planophila
Pythium_PV9_Otu00029	PV9	Otu00029	Otu29	Pythium
Chloromonas_PV9_Otu00079	PV9	Otu00079	Otu79	Chloromonas
Spumella_PV9_Otu00105	PV9	Otu00105	Otu105	Spumella
Oomycota_X_unclassified_PV9_Otu00362	PV9	Otu00362	Otu362	Phytophthora
Glissomonadida_unclassified_PV9_Otu00808	PV9	Otu00808	Otu808	Thaumatomonas
Hyaloperonospora_PV9_Otu01157	PV9	Otu01157	Otu1157	Hyaloperonospora
Oomycota_X_unclassified_PV9_Otu02258	PV9	Otu02258	Otu2258	Albugo
Oomycota_X_unclassified_PV9_Otu02596	PV9	Otu02596	Otu2596	Albugo
