# Supplementary material for: Machine Learning Reveals Biocontrol Agents Shaping Disease Protection in Natural Arabidopsis Populations and Synthetic Communities
Source: Research Square preprint supplement (doi:10.21203/rs.3.rs-6130404/v1), 2025-03-14
Supplement: Supplementary file 3 [file 58b3b1d936c5d0be4b6b3b12.xlsx]

## Sheet: Table_S3strain sequence
OTU_Genus	Taxa	Category	OTU sequences	NCBI db for blast	Percentage identity	closely matches species	Hit Rank	sequencing of strais	Forward seq	Reverse seq
Sphingomonas_Otu000015	Bacteria	Hcom	>Otu000015	16S rRNA	98.95	Sphingomonas melonis		16S rRNA
			TGGTAGTCCACGCCGTAAACGATGATAACTAGCTGTCCGGGGACTTAGTCTTTGGGTGGCGCAGCTAACGCATTAAGTTATCCGCCTGGGGAGTACGGCCGCAAGGTTAAAACTCAAATGAATTGACGGGGGCCTGCACAAGCGGTGGAGCATGTGGTTTAATTCGAAGCAACGCGCAGAACCTTACCAGCGTTTGACATGTCCGGACGATTTCCAGAGATGGATCTCTTCCCTTCGGGGACTGGAACACAGGTGCTGCATGGCTGTCGTCAGCTCGTGTCGTGAGATGTTGGGTTAAGTCCCGCAACGAGCGCAACCCTCGACTTTAGTTACCATCATTCAGTTGGGTACTCTAAAGTAACCGCCGGTGATAAGCCGGA--						TGCAAGTCGAACGAGACCTTCGGGTCTAGTGGCGCACGGGTGCGTAACGCGTGGGAATCT GCCCCTTGGTTCGGAATAACAGTTGGAAACGACTGCTAATACCGGATGATGACGTAAGTC CAAAGATTTATCGCCGAGGGATGAGCCCGCGTAGGATTAGGTAGTTGGTGTGGTAAAGGC GCACCAAGCCGACGATCCTTAGCTGGTCTGAGAGGATGATCAGCCACACTGGGACTGAGA CACGGCCCAGACTCCTACGGGAGGCAGCAGTGGGGAATATTGGACAATGGGCGAAAGCCT GATCCAGCAATGCCGCGTGAGTGATGAAGGCCTTAGGGTTGTAAAGCTCTTTTACCCGGG ATGATAATGACAGTACCGGGAGAATAAGCTCCG…	CGTGGGTCGCCTGCCTCCTCTTGCGAGGTTAGCGCAACGCCTTCGGGTGAACCCAACTCC CATGGTGTGACGGGCGGTGTGTACAAGGCCTGGGAACGTATTCACCGCGGCATGCTGATC CGCGATTACTAGCGATTCCGCCTTCATGCTCTCGAGTTGCAGAGAACAATCCGAACTGAG ACGGCTTTTGGAGATTAGCTCACCGTCGCCGGTTTGCTGCCCACTGTCACCGCCATTGTA GCACGTGTGTAGCCCAGCGCGTAAGGGCCATGAGGACTTGACGTCATCCCCACCTTCCTC CGGCTTATCACCGGCGGTTCCTTTAGAGTCCCCAACTGAATGATGGTAACTAAAGGCGAG GGTTGCGCTCGTTGCGGGACTTAACCCAACATC…
Methylobacterium_Otu000003	Bacteria	Hcom	>Otu000003	16S rRNA	99.21	Methylobacterium goesingense		16S rRNA
			TGGTAGTCCACGCCGTAAACGATGAATGCTAGCTGTTGGGGTGCTTGCACCGCAGTAGCGCAGCTAACGCTTTAAGCATTCCGCCTGGGGAGTACGGTCGCAAGATTAAAACTCAAAGGAATTGACGGGGGCCCGCACAAGCGGTGGAGCATGTGGTTTAATTCGAAGCAACGCGCAGAACCTTACCATCCCTT						ATGCAAGTCGAGCGGGCACTTTCGGGTGTCAGCGGCAGACGGGTGAGTAACACGTGGGAA CGTACCCTTTGGTTCGGAATAACGCTGGGAAACTAGCGCTAATACCGGATACGCCCTTTT GGGGAAAGGCTTGCTGCCGAAGGATCGGCCCGCGTCTGATTAGCTAGTTGGTGGGGTAAT GGCCTACCAAGGCGACGATCAGTAGCTGGTCTGAGAGGATGATCAGCCACACTGGGACTG AGACACGGCCCAGACTCCTACGGGAGGCAGCAGTGGGGAATATTGGACAATGGGCGCAAG CCTGATCCAGCCATGCCGCGTGAGTGATGAAGGCCTTAGGGTTGTAAAGCTCTTTTGTCC GGGACGATAATGACGGTACCGGAAGAATAAGCC…	GGTCGCCTGCCTCCTTGCGGTTGGCGCAGCGCCGTCGGGTAAGACCAACTCCCATGGTGT GACGGGCGGTGTGTACAAGGCCCGGGAACGTATTCACCGTGGCATGCTGATCCACGATTA CTAGCGATTCCGCCTTCATGCACTCGAGTTGCAGAGTGCAATCTGAACTGAGACGGTTTT TGGGGATTTGCTCGACCTCGCGGTTTCGCGTCCCACTGTCACCGCCATTGTAGCACGTGT GTAGCCCATCCCGTAAGGGCCATGAGGACTTGACGTCATCCACACCTTCCTCGCGGCTTA TCACCGGCAGTCTCCCTAGAGTGCCCAACTGAATGATGGCAACTAAGGACGTGGGTTGCG CTCGTTGCGGGACTTAACCCAACATCTCACGAC…
Duganella_Otu000004	Bacteria	Dcom	>Otu000004	16S rRNA	100	Duganella zoogloeoides		16S rRNA gene sequencing
			TGGTAGTCCACGCCCTAAACGATGTCTACTAGTTGTCGGGTTTTAATTAACTTGGTAACGCAGCTAACGCGTGAAGTAGACCGCCTGGGGAGTACGGTCGCAAGATTAAAACTCAAAGGAATTGACGGGGACCCGCACAAGCGGTGGATGATGTGGATTAATTCGATGCAACGCGAAAAACCTTACCTACCCTTGACATGGCAGAAATCCCGGAGAGATTCGGGAGTGCTCGAAAGAGAATCTGCACACAGGTGCTGCATGGCTGTCGTCAGCTCGTGTCGTGAGATGTTGGGTTAAGTCCCGCAACGAGCGCAACCCTTGTCATTAGTTGCTACGAAAGAGCACTCTAATGAGACTGCCGGTGACAAACCGGA--						GCAGTCGACGGCAGCGCGGGGCAACCTGGCGGCGAGTGGCGAACGGGTGAGTAATATATC GGAACGTACCCTGGAGTGGGGGATAACGTAGCGAAAGTTACGCTAATACCGCATACGATC TAAGGATGAAAGTGGGGGATCG	CCTACCGTGGTAAGCGCCCTCCTTGCGGTTAAGCTACCTACTTCTGGTAAACCCGCTCCC ATGGTGTGACGGGCGGTGTGTACAAGACCCGGGAACGTATTCACCGCGACATGCTGATCC GCGATTACTAGCGATTCCAACTTCATGCAGTCGAGTTGCAGACTACAATCCGGACTACGA TACACTTTCTGGGATTAGCTCCCCCTCGCGGGTTGGCGGCCCTCTGTATGTACCATTGTA TGACGTGTGAAGCCCTACCCATAAGGGCCATGAGGACTTGACGTCATCCCCACCTTCCTC CGGTTTGTCACCGGCAGTCTCATTAGAGTGCTCTTTCGTAGCAACTAATGACAAGGGTTG CGCTCGTTGCGGGACTTAACCCAACATCTCACG…
Pseudomonas_Otu000006	Bacteria	Dcom	>Otu000006	16S rRNA	99.74	Pseudomonas viridiflava		16S rRNA gene sequencing
			TGGTAGTCCACGCCGTAAACGATGTCAACTAGCCGTTGGAATCCTTGAGATTTTAGTGGCGCAGCTAACGCATTAAGTTGACCGCCTGGGGAGTACGGCCGCAAGGTTAAAACTCAAATGAATTGACGGGGGCCCGCACAAGCGGTGGAGCATGTGGTTTAATTCGAAGCAACGCGAAGAACCTTACCAGGCCTTGACATCCAATGAATCCTTTAGAGATAGAGGAGTGCCTTCGGGAGCATTGAGACAGGTGCTGCATGGCTGTCGTCAGCTCGTGTCGTGAGATGTTGGGTTAAGTCCCGTAACGAGCGCAACCCTTGTCCTTAGTTACCAGCACGTCATGGTGGGCACTCTAAGGAGACTGCCGGTGACAAACCGGA--						TGCAAGTCGAGCGGTAGAGAGAAGCTTGCTTCTCTTGAGAGCGGCGGACGGGTGAGTAAT GCCTAGGAATCTGCCTGGTAGTGGGGGATAACGCTCGGAAACGGACGCTAATACCGCATA CGTCCTACGGGAGAAAGCAGGGGACCTTCGGGCCTTGCGCTATCAGATGAGCCTAGGTCG GATTAGCTAGTTGGTGAGGTAATGGCTCACCAAGGCGACGATCCGTAACTGGTCTGAGAG GATGATCAGTCACACTGGAACTGAGACACGGTCCAGACTCCTACGGGAGGCAGCAGTGGG GAATATTGGACAATGGGCGAAAGCCTGATCCAGCCATGCCGCGTGTGTGAAGAAGGTCTT CGGATTGTAAAGCACTTTAAGTTGGGAGGAAGG…	GTGGGTAACCGTCCTCCCGAAGGTTAGACTAGCTACTTCTGGTGCAACCCACTCCCATGG TGTGACGGGCGGTGTGTACAAGGCCCGGGAACGTATTCACCGCGACATTCTGATTCGCGA TTACTAGCGATTCCGACTTCACGCAGTCGAGTTGCAGACTGCGATCCGGACTACGATCGG TTTTGTGAGATTAGCTCCACCTCGCGGCTTGGCAACCCTCTGTACCGACCATTGTAGCAC GTGTGTAGCCCAGGCCGTAAGGGCCATGATGACTTGACGTCATCCCCACCTTCCTCCGGT TTGTCACCGGCAGTCTCCTTAGAGTGCCCACCTTAACGTGCTGGTAACTAAGGACAAGGG TTGCGCTCGTTACGGGACTTAACCCAACATCTC…
unclassified_Rhizophydiales_Otu00126	Fungi (yeast)	HCom	>Otu00126	ITS	99.57	Cystofilobasidium macerans		ITS gene sequencing
			AACTCTCACCTCCAGCCTTCTTTAATTAGAGGTGTTGGGGCGTGGACGTGAGTGCTGCTGGTGCCCTGGTTGCATCGGCTCACTTGAAATACATTAGCTGAATCCTCTAGAGGTGGTTCTACTCGACGTGATAAGATCTCCGTCGAGGACAGTGCAACTTGTTGTGCTGGCCGCCGCTAGCTGTTGATACGCTTCTAATTAGCGCAGACTTCGAGTGCTGGCAACTTTTGACA						CGTGGGTCGCCTGCCTCCTCTTGCGAGGTTAGCGCAACGCCTTCGGGTGAACCCAACTCC CATGGTGTGACGGGCGGTGTGTACAAGGCCTGGGAACGTATTCACCGCGGCATGCTGATC CGCGATTACTAGCGATTCCGCCTTCATGCTCTCGAGTTGCAGAGAACAATCCGAACTGAG ACGGCTTTTGGAGATTAGCTCACCGTCGCCGGTTTGCTGCCCACTGTCACCGCCATTGTA GCACGTGTGTAGCCCAGCGCGTAAGGGCCATGAGGACTTGACGTCATCCCCACCTTCCTC CGGCTTATCACCGGCGGTTCCTTTAGAGTCCCCAACTGAATGATGGTAACTAAAGGCGAG GGTTGCGCTCGTTGCGGGACTTAACCCAACATC…	TCCGGGGGCTCTCTTTATTCACACACCCCTGTGCACTTTGGCCACCTGCCGCGCTTAACT GCGTTAGTAGGTGTGTCTCTTTATTTATACCCATATACACAAGTCATTGAATGTAAAATC GTTATAAACTAATATAACTTTCAACAACGGATCTCTTGGTTCTCGCATCGATGAAGAACG CAGCGAATTGCGATAAGTAATGTGAATTGCAGAATTCAGTGAATCATCGAATCTTTGAAC GCATCTTGCGCTCTTTGGTATTCCGAAGAGCATGCCTGTTTGAGTGTCATGAAACTCTCA CCTCCAGCCTTCTTTAATTAGAGGTGTTGGGGCGTGGACGTGAGTGCTGCTGGTGCCCTG GTTGCATCGGCTCACTTGAAATACATTAGCTGA…
Plectosphaerella_Otu00016	Fungi	DCom	>Otu00016	ITS	99.04	Plectosphaerella cucumerina	second hit in blast	ITS gene sequencing
			CAACCCTCGAGCCCCCGTGGCCCGGCGTTGGGGATCTGCCACGGCAGGCCCCTAAAACCAGTGGCGGACCCGAAGGCCCTCTCCTTTGCGCAGTAGCATCAGCCTCGCATTGGGATCCCTCGGCGTCCTGCCTCTAAACCCCCCACAAGTCCGCTCCGGCGGCACCAA						CTGATCCGAGGTCAACCTTGGGTGCCGCCGAGGCGGGCTTGTGGGGGGTTTAGAGGCAGG ACTCCGAGGACTCCCGATGCGAGGCGAATGCTACTGCGCAAAGGAGAGGGCCCTTCGGGT CCGCCACTGGTTTTAGGGGCCTGCCGTGGCAGATCCCCAACGCCGGGCCACAGGGGCTCG AGGGTTGAAACGACGCTCGGACAGGCATGCCTCCCAGGATACTGGAAGGCGCCATGTGCG TTCAAAGATTCGATGATTCACTGAATTCTGCAATTCACATTACATATCGCGTTTCGCTGC GTTCTTCATCGATGCTGGAGCCAAGAGATCCGTTGTTAAAAGTTTTGACAGTTCGCTAAG AACACTCAGAAGTATCGTCGGGTTCGAAAACAG…	CTGATCCGAGGTCAACCTTGGGTGCCGCCGAGGCGGGCTTGTGGGGGGTTTAGAGGCAGG ACTCCGAGGACTCCCGATGCGAGGCGAATGCTACTGCGCAAAGGAGAGGGCCCTTCGGGT CCGCCACTGGTTTTAGGGGCCTGCCGTGGCAGATCCCCAACGCCGGGCCACAGGGGCTCG AGGGTTGAAACGACGCTCGGACAGGCATGCCTCCCAGGATACTGGAAGGCGCCATGTGCG TTCAAAGATTCGATGATTCACTGAATTCTGCAATTCACATTACATATCGCGTTTCGCTGC GTTCTTCATCGATGCTGGAGCCAAGAGATCCGTTGTTAAAAGTTTTGACAGTTCGCTAAG AACACTCAGAAGTATCGTCGGGTTCGAAAACAG…
Rhogostoma-lineage_unclassified_Otu00003	Nonfungal eukaryotes	Hcom	>Otu00003	NR Type material		Rhogostoma epiphylla	second hit in blast
			TTAGATGTTCTGGGCCGCACGCGCGCTACACTGATCGGTTCATCGAGCATAAAACCTTGACTGATAAGTCTGGGTAATCTTTTGAAAACCGGTCGTGCTGGGGATAGATCATTGCAATTATTGATCTTCAACGAGGAATTCCTAGTAAACGCGAGTCATCAACTCGCATTGATTACGTCCCTGCCCTTTGTACACACCGCCCGTCGCTACTACCGATTGAATGGCTTAGTGAGCTCTCTGGACTGTTGTGTGTTAGGGGCAACTCTGACACGCAAACGGGAAGGAGATCAAACTTGATCATTTAGAGGAAGTAAAAGTCGTAACAAGGTTTCC--
Albugo_Otu00005	Nonfungal eukaryotes	Dcom	>Otu00005	NR	100	Albugo laibachii NC14
			TTAGATGTTCTGGGCCGCACGCGCGCTACACTGATGCGTTCAACGAGTTTAAAACCTTGACCGATAGGTCTGGGTAATCTTGTGAATGCGCATCGTGCTAGGGATAGATTGTTGCAATTTTCAATCTTGAACGAGGAATTCCTAGTAAATGCAAGTCATCAGCTTGCGTTGATTACGTCCCTGCCCTTTGTACACACCGCCCGTCGCACCTACCGATTGAATGACTCGGTGAAGAATTGGGACCGTGAATCTGTTTGCTTCATTGCGAATGGATTTGTGGGAACTTTTTTTAACCTCGCCATTTAGAGGAAGGTGAAGTCGTAACAAGGTTTCC--
SynCom strains assambly are explained in https://doi.org/10.1093/ismeco/ycae117	Bacteria	SynCom				Methylobacterium goesingense		16S rRNA gene sequencing	>Methylobacterium_goesingense
									CAACTTGAGAGTTTGATCCTGGCTCAGAGCGAACGCTGGCGGCAGGCTTAACACATGCAAGTCGAGCGGGCACTTTCGGGTGTCAGCGGCAGACGGGTGAGTAACACGTGGGAACGTACCCTTTGGTTCGGAATAACGCTGGGAAACTAGCGCTAATACCGGATACGCCCTTTTGGGGAAAGGCTTGCTGCCGAAGGATCGGCCCGCGTCTGATTAGCTAGTTGGTGGGGTAATGGCCTACCAAGGCGACGATCAGTAGCTGGTCTGAGAGGATGATCAGCCACACTGGGACTGAGACACGGCCCAGACTCCTACGGGAGGCAGCAGTGGGGAATATTGGACAATGGGCGCAAGCCTGATCCAGCCATGCCGCGTGAGTGATGAAGGCCTTAGGGTTGT…
SynCom strains assambly are explained in https://doi.org/10.1093/ismeco/ycae119	Bacteria	SynCom				Bacillus altitudinis		16S rRNA gene sequencing	>Bacillus_altitudinis
									CCTGCCACCTTCGGCGGCTGGCTCCATAAAGGTTACCTCACCGACTTCGGGTGTTGCAAACTCTCGTGGTGTGACGGGCGGTGTGTACAAGGCCCGGGAACGTATTCACCGCGGCATGCTGATCCGCGATTACTAGCGATTCCAGCTTCACGCAGTCGAGTTGCAGACTGCGATCCGAACTGAGAACAGATTTGTGGGATTGGCTAAACCTTGCGGTCTCGCAGCCCTTTGTTCTGTCCATTGTAGCACGTGTGTAGCCCAGGTCATAAGGGGCATGATGATTTGACGTCATCCCCACCTTCCTCCGGTTTGTCACCGGCAGTCACCTTAGAGTGCCCAACTGAATGCTGGCAACTAAGATCAAGGGTTGCGCTCGTTGCGGGACTTAACCCAACATCT…
SynCom strains assambly are explained in https://doi.org/10.1093/ismeco/ycae121	Bacteria	SynCom				Rhizobium skierniewicense		16S rRNA gene sequencing	>Rhizobium_skierniewicense
									CAACTTGAGAGTTTGATCCTGGCTCAGAACGAACGCTGGCGGCAGGCTTAACACATGCAAGTCGAACGCCCCGCAAGGGGAGTGGCAGACGGGTGAGTAACGCGTGGGAATCTACCCAACCCTGCGGAATAGCTCTGGGAAACTGGAATTAATACCGCATACGCCCTACGGGGGAAAGATTTATCGGGGATGGATGAGCCCGCGTTGGATTAGCTAGTTGGTGGGGTAAAGGCCTACCAAGGCGACGATCCATAGCTGGTCTGAGAGGATGATCAGCCACATTGGGACTGAGACACGGCCCAAACTCCTACGGGAGGCAGCAGTGGGGAATATTGGACAATGGGCGCAAGCCTGATCCAGCCATGCCGCGTGAGTGATGAAGGCCTTAGGGTTGTAAAG…
SynCom strains assambly are explained in https://doi.org/10.1093/ismeco/ycae123	Bacteria	SynCom				Sphingomonas faeni		16S rRNA gene sequencing	>Sphingomonas_faeni
									CTGCACGCCTTCGGGTGAATCCAACTCCCATGGTGTGACGGGCGGTGTGTACAAGGCCTGGGAACGTATTCACCGCGGCATGCTGATCCGCGATTACTAGCGATTCCGCCTTCATGCTCTCGAGTTGCAGAAAACAATCCGAACTGAGACGGCTTTTGGAGATTAGCTCACACTCGCGTGCTTGCTGCCCACTGTCACCGCCATTGTAGCACGTGTGTAGCCCAGCGCGTAAGGGCCATGAGGACTTGACGTCATCCCCACCTTCCTCCGGCTTATCACCGGCGGTTCCTTTAAAGTGCCCAACTAAATGATGGCAACTAAAGGCGAGGGTTGCGCTCGTTGCGGGACTTAACCCAACATCTCACGACACGAGCTGACGACAGCCATGCAGCACCTGTG…
SynCom strains assambly are explained in https://doi.org/10.1093/ismeco/ycae125	Bacteria	SynCom				Pseudomonas koreensis		16S rRNA gene sequencing	>Pseudomonas_koreensis
									GAACTGAAGAGTTTGATCATGGCTCAGATTGAACGCTGGCGGCAGGCCTAACACATGCAAGTCGAGCGGATGAAAGGAGCTTGCTCCTGGATTCAGCGGCGGACGGGTGAGTAATGCCTAGGAATCTGCCTGGTAGTGGGGGACAACGTTTCGAAAGGAACGCTAATACCGCATACGTCCTACGGGAGAAAGCAGGGGACCTTCGGGCCTTGCGCTATCAGATGAGCCTAGGTCGGATTAGCTAGTTGGTGAGGTAATGGCTCACCAAGGCGACGATCCGTAACTGGTCTGAGAGGATGATCAGTCACACTGGAACTGAGACACGGTCCAGACTCCTACGGGAGGCAGCAGTGGGGAATATTGGACAATGGGCGAAAGCCTGATCCAGCCATGCCGCGT…
SynCom strains assambly are explained in https://doi.org/10.1093/ismeco/ycae127	Bacteria	SynCom				Flavobacterium pectinovorum		16S rRNA gene sequencing	>Flavobacterium_pectinovorum
									ACGATGAAGAGTTTGATCCTGGCTCAGGATGAACGCTAGCGGCAGGCTTAACACATGCAAGTCGAGGGGTATGCTTCTTCGGAAGCAGAGACCGGCGCACGGGTGCGTAACGCGTATGCAATCTACCTTTTACAGGGGGATAGCCCAGAGAAATTTGGATTAATACCCCATAGTATAGCAATCTCGCATGAGATCACTATTAAAGTCACAACGGTAAAAGATGAGCATGCGTCCCATTAGCTAGTTGGTAAGGTAACGGCTTACCAAGGCTACGATGGGTAGGGGTCCTGAGAGGGAGATCCCCCACACTGGTACTGAGACACGGACCAGACTCCTACGGGAGGCAGCAGTGAGGAATATTGGACAATGGGCGCAAGCCTGATCCAGCCATGCCGCGTG…
SynCom strains assambly are explained in https://doi.org/10.1093/ismeco/ycae129	Bacteria	SynCom				Microbacterium proteolyticum		16S rRNA gene sequencing	>Microbacterium_proteolyticum
									TTTACGGAGAGTTTGATCCTGGCTCAGGATGAACGCTGGCGGCGTGCTTAACACATGCAAGTCGAACGGTGAAGCCAAGCTTGCTTGGTGGATCAGTGGCGAACGGGTGAGTAACACGTGAGCAACCTGCCCTGGACTCTGGGATAAGCGCTGGAAACGGTGTCTAATACTGGATATGAGCCTCTATCGCATGGTGGGGGTTGGAAAGATTTTTTGGTCTGGGATGGGCTCGCGGCCTATCAGCTTGTTGGTGAGGTAATGGCTCACCAAGGCGTCGACGGGTAGCCGGCCTGAGAGGGTGACCGGCCACACTGGGACTGAGACACGGCCCAGACTCCTACGGGAGGCAGCAGTGGGGAATATTGCACAATGGGCGGAAGCCTGATGCAGCAACGCCGC…
SynCom strains assambly are explained in https://doi.org/10.1093/ismeco/ycae131	Bacteria	SynCom				Arthrobacter humicola		16S rRNA gene sequencing	>Arthrobacter_humicola
									TCAACGGAGAGTTTGATCCTGGCTCAGGATGAACGCTGGCGGCGTGCTTAACACATGCAAGTCGAACGATGATCCGGTGCTTGCACCGGGGATTAGTGGCGAACGGGTGAGTAACACGTGAGTAACCTGCCCTTAACTCTGGGATAAGCCTGGGAAACTGGGTCTAATACCGGATATGACTCCTCATCGCATGGTGGGGGGTGGAAAGCTTTATTGTGGTTTTGGATGGACTCGCGGCCTATCAGCTTGTTGGTGAGGTAATGGCTCACCAAGGCGACGACGGGTAGCCGGCCTGAGAGGGTGACCGGCCACACTGGGACTGAGACACGGCCCAGACTCCTACGGGAGGCAGCAGTGGGGAATATTGCACAATGGGCGCAAGCCTGATGCAGCGACGCC…
SynCom strains assambly are explained in https://doi.org/10.1093/ismeco/ycae133	Bacteria	SynCom				Frigoribacterium faeni		16S rRNA gene sequencing	>Frigoribacterium_faeni
									TTTACGGAGAGTTTGATCCTGGCTCAGGACGAACGCTGGCGGCGTGCTTAACACATGCAAGTCGAACGATGAACTGGAGCTTGCTCCAGGAATTAGTGGCGAACGGGTGAGTAACACGTGAGTAACCTGCCCTTGACTCTGGGATAAGCGCTGGAAACGGCGTCTAATACCGGATACGAGCTTCAGCCGCATGGCTAGGAGTTGGAAAGAATTTCGGTCAAGGATGGACTCGCGGCCTATCAGCTAGTTGGTGAGGTAATGGCTCACCAAGGCGACGACGGGTAGCCGGCCTGAGAGGGTGACCGGCCACACTGGGACTGAGACACGGCCCAGACTCCTACGGGAGGCAGCAGTGGGGAATATTGCACAATGGGCGCAAGCCTGATGCAGCAACGCCGC…
SynCom strains assambly are explained in https://doi.org/10.1093/ismeco/ycae135	Bacteria	SynCom				Aeromicrobium fastidiosum		16S rRNA gene sequencing	>Aeromicrobium_fastidiosum
									CCTTCGCATGTTGGGGGTTGGAAAGCTCCGGCGGAGAAGGATGAGCTCGCGGCCTATCAGCTTGTTGGTGAGGTAATGGCTCACCAAGGCATTGACGGGTAGCCGGCCTGAGAGGGTGACCGGCCACACTGGGACTGAGACACGGCCCAGACTCCTACGGGAGGCAGCAGTGGGGAATATTGGACAATGGGCGAAAGCCTGATCCAGCAACGCCGCGTGAGGGATGACGGCCTTCGGGTTGTAAACCTCTTTCAGCAGGGACGAAGCGAGAGTGACGGTACCTGCAGAAGAAGGACCGGCCAACTACGTGCCAGCAGCCGCGGTAATACGTAGGGTCCGAGCGTTGTCCGGAATTATTGGGCGTAAAGGGCTCGTAGGCGGTTTGTCGCGTCGGGAGTG…
SynCom strains assambly are explained in https://doi.org/10.1093/ismeco/ycae137	Bacteria	SynCom				Nocardioides cavernae		16S rRNA gene sequencing	>Nocardioides_cavernae
									TCGATGGAGAGTTTGATCCTGGCTCAGGACGAACGCTGGCGGCGTGCTTAACACATGCAAGTCGAGCGGAAAGGCTCCTTCGGGGGTACTCGAGCGGCGAACGGGTGAGTAACACGTGAGTAATCTGCCCCTGGCTTTGGGATAGCCACCGGAAACGGTGATTAATACCGGATACGACCACTTCTCGCATGGGATGGTGGTGGAAAGTTTTTCGGCCAGGGATGTGCTCGCGGCCTATCAGCTTGATGGTGAGGTAATGGCTCACCATGGCTTCGACGGGTAGCCGGCCTGAGAGGGTGACCGGCCACACTGGGACTGAGACACGGCCCAGACTCCTACGGGAGGCAGCAGTGGGGAATATTGGACAATGGGCGGAAGCCTGATCCAGCAACGCCGCGT…
SynCom strains assambly are explained in https://doi.org/10.1093/ismeco/ycae139	Bacteria	SynCom				Paenibacillus amylolyticus		16S rRNA gene sequencing	>Paenibacillus_amylolyticus
									TTATTGGAGAGTTTGATCCTGGCTCAGGACGAACGCTGGCGGCATGCCTAATACATGCAAGTCGAGCGGACTTGATGAGAAGCTTGCTTCTCTGATAGTTAGCGGCGGACGGGTGAGTAACACGTAGGCAACCTGCCCTCAAGTTTGGGACAACTACCGGAAACGGTAGCTAATACCGAATAGTTGTTTTCTTCGCCTGAAGGAAACTGGAAAGACGGAGCAATCTGTCACTTGGGGATGGGCCTGCGGCGCATTAGCTAGTTGGTGGGGTAACGGCTCACCAAGGCGACGATGCGTAGCCGACCTGAGAGGGTGATCGGCCACACTGGGACTGAGACACGGCCCAGACTCCTACGGGAGGCAGCAGTAGGGAATCTTCCGCAATGGGCGAAAGCCTGA…
SynCom strains assambly are explained in https://doi.org/10.1093/ismeco/ycae141	Fungi (yeast)	SynCom				Dioszegia hungarica		ITS gene sequencing	>Dioszegia_hungarica
									TCAACCTGATTTGAGGTCAGAATATAAATTGTATTAGAGTGGAGGGTTGCGAGAACTTATTACGCATTCCACTTAGTCATTTAAGGCGAGCCAGGTAAATGGCAACACCCAAAGCACCAACCTATTGTGATAAAACATTAGGGGTGAGGTTTATAAGACACTCAAACAGGCATGCCCTTCGGAATACCAAAGGGCGCAATTTGCGTTCAAAGATTCGATGATTCACTGAATTCTGCAATTCACATTACTTATCGCATTTCGCTGCGTTCTTCATCGATGTGAGAGCCAAGAGATCCGTTGTTGAAAGTTGTATTTATTATAGTAGATTACATTCATTACATTATGTTTGTTTGGTGCCCGAAGGCAAATAGTTCACAGGTGTATAGGATGATAAAAGCT…
SynCom strains assambly are explained in https://doi.org/10.1093/ismeco/ycae143	Fungi (yeast)	SynCom				Sporobolomyces roseus		ITS gene sequencing	>Sporobolomyces_roseus
									TGCCTGATTTGAGATCTAATCTAAAGGTAGACTTTTCAATTAGAAGCTTCCATAATTAAGTTGGCTCAATGCGAACATTGAATCCTTAGCGAATAGTCTATTACGCCAAGTCAATCCAAACTTGTATTAGGGATGCTGATGTATTACGAACGAGCTAGGCACGAAGCCAGCAGCGCTCAGAATCCAAACACCAGCTGTTTACAAGAAACAGTTGGGTTGAAGAATTCATGACACTCAAACAGACATGCTCTCCGGAATACCAGAGAGCGCAAGATGCGTTCAAAGATTCGATGATTCACTGAATTCTGCAATTCACATTACGTATCGCATTTCGCTGCGTTCTTCATCGATGCGAGAGCCAAGAGATCCGTTGTTGAAAGTTTTTATTTGTTATAAAAA…
SynCom strains assambly are explained in https://doi.org/10.1093/ismeco/ycae145	Fungi (yeast)	SynCom				Rhodotorulakratochvilovae		ITS gene sequencing	>Rhodotorula_kratochvilovae
									CCTGATTTGAGATCTAATCAAAAAATAGACTTTAGGATTAGAAGCTTCCTTTAACCCAACCCGGCTCTAGTACGAGACTAGAATCCTCAGCGAATAGTCTATTACGCCAAGTCAATCCGAAGTTCGGTTGCGGATGCTAATGCATTACGAACGAGCTAAGCCGAAGCAGAGCAGCGCTCAGAAACCAAGCACCACCAGATTCACTAAGAAAGAGGTGGGTTGAAGATTTCATGACACTCAAACAGGCATGCTCCTCGGAATACCAAGGAGCGCAAGGTGCGTTCAAAGATTCGATGATTCACTGAATTCTGCAATTCACATTACGTATCGCATTTCGCTGCGTTCTTCATCGATGCGAGAGCCAAGAGATCCGTTGTTGAAAGTTTTGTTTTGTTATAA…
