# Supplementary material for: Machine Learning Reveals Biocontrol Agents Shaping Disease Protection in Natural Arabidopsis Populations and Synthetic Communities
Source: Research Square preprint supplement (doi:10.21203/rs.3.rs-6130404/v1), 2025-03-14
Supplement: Supplementary file 4 [file ec36eedcef4d57ae5b8c9e23.xlsx]

## Sheet: GenotypeInfectio_SiteInfection
genotypeclusters effect	Df	SumOfSqs	R2	F	Pr(>F)	taxa	R2%
sample$genotypecluster	4	1.78829	0.060741	1.49956	0.010299	Bacteria16SrRNA	6.1
sample$Infection	1	0.961681	0.0326643	3.22563	0.00029997	Bacteria16SrRNA	3.3
sample$genotypecluster:sample$Infection	2	0.455241	0.0154627	0.763475	0.830617	Bacteria16SrRNA	1.5
Residual	88	26.2361	0.891132	NA	NA	Bacteria16SrRNA	89.1
Total	95	29.4413	1	NA	NA	Bacteria16SrRNA	100
sample$genotypecluster	4	1.91937	0.0526027	1.26666	0.0743926	FITS2	5.3
sample$Infection	1	0.532146	0.0145841	1.40472	0.115088	FITS2	1.5
sample$genotypecluster:sample$Infection	2	0.699854	0.0191803	0.923714	0.572143	FITS2	1.9
Residual	88	33.3367	0.913633	NA	NA	FITS2	91.4
Total	95	36.4881	1	NA	NA	FITS2	100
sample$genotypecluster	4	2.64768	0.0712714	2.01444	0.0009999	Eukaryotes	7.1
sample$Infection	1	5.17228	0.13923	15.741	9.99900009999e-05	Eukaryotes	13.9
sample$genotypecluster:sample$Infection	2	0.413607	0.0111337	0.629373	0.923208	Eukaryotes	1.1
Residual	88	28.9156	0.778365	NA	NA	Eukaryotes	77.8
Total	95	37.1492	1	NA	NA	Eukaryotes	100
Sites effect	Df	SumOfSqs	R2	F	Pr(>F)	taxa	R2%
sample$Site	5	7.04949	0.0605468	4.45418	9.99900009999e-05	Bacteria16SrRNA	6.1
sample$Infection	1	1.27468	0.010948	4.02698	9.99900009999e-05	Bacteria16SrRNA	1.1
sample$Site:sample$Infection	3	1.43429	0.0123189	1.51042	0.00569943	Bacteria16SrRNA	1.2
Residual	337	106.672	0.916186	NA	NA	Bacteria16SrRNA	91.6
Total	346	116.43	1	NA	NA	Bacteria16SrRNA	100
sample$Site	5	7.93168	0.0647593	3.94917	9.99900009999e-05	FITS2	6.5
sample$Infection	1	0.443912	0.00362438	1.10512	0.272873	FITS2	0.4
sample$Site:sample$Infection	3	1.22924	0.0100363	1.02006	0.40476	FITS2	1
Residual	281	112.874	0.92158	NA	NA	FITS2	92.2
Total	290	122.479	1	NA	NA	FITS2	100
sample$Site	5	12.1653	0.117789	8.07659	9.99900009999e-05	Eukaryotes	11.8
sample$Infection	1	8.91675	0.0863357	29.5994	9.99900009999e-05	Eukaryotes	8.6
sample$Site:sample$Infection	3	0.861124	0.00833776	0.952842	0.489751	Eukaryotes	0.8
Residual	270	81.3369	0.787537	NA	NA	Eukaryotes	78.8
Total	279	103.28	1	NA	NA	Eukaryotes	100
